# Supplementary material for: Indoor Exposure to Selected Air Pollutants in the Home Environment: A Systematic Review
Source: Int J Environ Res Public Health. 2020 Dec 2;17(23):8972. doi: 10.3390/ijerph17238972 (PMC7729884; doi:10.3390/ijerph17238972)
Supplement: Supplementary file 1 [file ijerph-17-08972-s001.pdf]

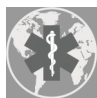

Review

# Supplementary Materials: Indoor Exposure to Chemical Air Pollutants in the Home Environment: A Systematic Review

Sotiris Vardoulakis <sup>1,2</sup>, Evanthia Giagloglou <sup>1</sup>, Susanne Steinle <sup>1</sup>, Alice Davis <sup>1</sup>, Anne Sleenwenhoek <sup>1</sup>, Karen S. Galea <sup>1</sup>, Ken Dixon <sup>1</sup> and Joanne O. Crawford <sup>1,3</sup>

<sup>1</sup> Institute of Occupational Medicine (IOM), EH14 4AP Edinburgh, UK; eva.giagloglou@iom-world.org (E.G.); susanne.steinle@iom-world.org (S.S.); alice.davis@iom-world.org (A.D.); anne.sleenwenhoek@iom-world.org (A.S.); karen.galea@iom-world.org (K.S.G.); ken.dixon@iom-world.org (K.D.); joanne.crawford@vuw.ac.nz (J.O.C.)

<sup>2</sup> National Centre for Epidemiology and Population Health, Research School of Population Health, Australian National University, ACT 2601 Canberra, Australia

<sup>3</sup> Faculty of Health, Victoria University of Wellington, 6410 Wellington, New Zealand

\* Correspondence: sotiris.vardoulakis@anu.edu.au

## Search strategy

We extracted the following information from all eligible papers: type of study (e.g., monitoring or modelling); research question; dwelling type (detached, semi-detached, terraced, flat/floor); dwelling distance from outdoor sources (main road, industrial source, etc.); city, region, and country; occupant characteristics (age group, socioeconomic status, health status); study design (cross sectional, case control, before-after intervention, etc.); indoor sources (cooking, heating, tobacco smoking, consumer products, furnishings, etc.); pollutants monitored (e.g., PM<sub>2.5</sub>, NO<sub>2</sub>); sampling location (bedroom, kitchen, etc.); time, day and/or season of measurements; health outcome examined (e.g., asthma) and assessment method (self-reported, spirometry, etc.); reported effects of indoor air pollution on health; reported indoor exposure levels; reported determinants of indoor exposure (e.g., ventilation, building characteristics, indoor sources, occupancy patterns); reported evidence gaps; measurement methods (active sampling, passive sampling, equipment used, etc.); time duration of measurements; number of measurements taken.

On completion of data extraction, we rejected the poorer-quality papers (i.e., those based on one measurement or a single house), as well as those which did not comply with the following quality assessment criteria:

- (a) Measurement method—is it reported and is it a recognised method or equipment?
- (b) Measurement duration—are measurements carried out for at least 6 hours?
- (c) Number of measurements—is this listed within the paper?
- (d) Location where the sampler was placed—is this noted within the paper?

From the data extracted, evidence tables were prepared to aid the assessment process and to provide accessible documentation of the evidence on which the review is based.

## Search terms

((ab(house\* OR bungalow\* OR flat\* OR chalet\* OR tenement\* OR domicile\* OR home\* OR "terraced house\*" OR (domestic AND proper\*) OR (domestic AND dwelling\*) OR (domestic AND building\*)) AND "indoor air" AND ("air pollution" OR "air quality" OR "particulate matter" OR "Nitrogen Dioxide" OR NO<sub>2</sub> OR Ozone OR O<sub>3</sub> OR "Sulphur Dioxide" OR SO<sub>2</sub> OR "ultrafine particles" OR VOCs OR "volatile organic compounds" OR Formaldehyde OR Benzene OR Naphthalene OR PAH OR Trichloroethylene OR ("Carbon Monoxide" NOT poison\*)) AND (review OR "observational stud\*") AND (exposure OR monitor\* OR sampl\* OR measure\*) NOT ("biological

pollutant\*" OR "CO acute poisoning" OR ("biomass burning" AND rural) OR asbestos OR radon OR methane))) and (pd(20000101-20171128)) and (peer(yes)) and (sttype.exact("Scholarly Journals" OR "Reports") AND la.exact("English"))

**Table S1.** Summary of eligible study findings. Information on measurement methods is available in Vardoulakis et al. (2019) [169].  
(TVOC: total volatile organic compounds; TPAH: total polycyclic aromatic hydrocarbons; PM: particulate matter; UFP: ultrafine particles; TSP: total suspended particles; BC: black carbon; EC: elemental carbon; SBS: sick building syndrome; GM: geometric mean.)

| Reference                    | Population and dwelling type                                                      | City/region; country | Indoor pollution sources           | Pollutants                                                                                     | Sampling location                                                                          | Month/season and year                                          | Indoor exposure levels                                                                                                                                                                                                                                                                                                                                                                | Determinants of indoor exposure                                                                                                     |
|------------------------------|-----------------------------------------------------------------------------------|----------------------|------------------------------------|------------------------------------------------------------------------------------------------|--------------------------------------------------------------------------------------------|----------------------------------------------------------------|---------------------------------------------------------------------------------------------------------------------------------------------------------------------------------------------------------------------------------------------------------------------------------------------------------------------------------------------------------------------------------------|-------------------------------------------------------------------------------------------------------------------------------------|
| Abt et al. 2000 [126]        | Not recorded                                                                      | Boston area; USA     | Cooking, heating, carpet, cleaning | PM <sub>2.5</sub> –10, PM <sub>0.02</sub> –0.1, PM <sub>0.1</sub> –0.5, PM <sub>0.7</sub> –2.5 | Adjacent to area where the majority of activities occurred (i.e., kitchen and living room) | March 1996–June 1996                                           | Median concentrations ( $\mu\text{g}/\text{m}^3$ ) measured using Harvard impactors:<br>PM <sub>2.5</sub> : 11.6<br>PM <sub>10</sub> : 17.8<br>PM <sub>2.5</sub> –10: 4.3<br>Median concentrations ( $\mu\text{g}/\text{m}^3$ ) measured using SMPS/APS:<br>PM <sub>0.02</sub> –0.1: 0.33<br>PM <sub>0.1</sub> –0.5: 5.5<br>PM <sub>0.7</sub> –2.5: 2.2<br>PM <sub>2.5</sub> –10: 2.7 | Seasons, oven cooking, frying, toasting, cleaning, number of occupants, air exchange rates                                          |
| Adgate et al. 2004 [80]      | 153 households (single family detached, single family attached, apartment, other) | Minneapolis USA      | Smoking, room deodorisers          | 15 VOCs                                                                                        | Room where child spent most of time while awake                                            | Winter, January 2000–February 2000; spring April 2000–May 2000 | Median concentrations in winter and spring ( $\mu\text{g}/\text{m}^3$ ):<br>benzene: 2.2, 2.1<br>ethylbenzene: 1.0, 1.0<br>d-limonene: 28.6, 21.2<br>$\alpha$ -pinene: 2.4, 2.4<br>$\beta$ -pinene: 2.5, 1.5<br>toluene: 8.2, 8.9<br>m,p-xylene: 3.7, 3.3<br>o-xylene: 1.2, 1.1                                                                                                       | Smoking, cleaning supplies                                                                                                          |
| Adgate et al. 2004 [72]      | 248 households (single-family homes, apartments, mobile home)                     | Minnesota; USA       | Smoking, central air conditioning  | VOCs                                                                                           | Room where the family spent most time                                                      | May 1997–September 1987                                        | Median concentrations ( $\mu\text{g}/\text{m}^3$ ):<br>benzene: 4.6<br>m,p-xylene: 7.9<br>o-xylene: 2.9<br>toluene: 23.4                                                                                                                                                                                                                                                              | Not reported                                                                                                                        |
| Alexopoulos et al. 2006 [77] | 50 households                                                                     | Athens; Greece       | Smoking                            | Toluene, xylene                                                                                | Not reported                                                                               | September 1997–September 1998                                  | Mean concentrations ( $\mu\text{g}/\text{m}^3$ ):<br>toluene: 49.2<br>xylene: 43.7                                                                                                                                                                                                                                                                                                    | Location (centre or suburb), proximity to busy road and proximity to gasoline station, heating mode, recent painting, type/floor of |

|                                    |                                                       |                                                                  |                                                                                                                      |                                                                                               |                              |                                               |                                                                                                                                                                                                |                                                                                                                |
|------------------------------------|-------------------------------------------------------|------------------------------------------------------------------|----------------------------------------------------------------------------------------------------------------------|-----------------------------------------------------------------------------------------------|------------------------------|-----------------------------------------------|------------------------------------------------------------------------------------------------------------------------------------------------------------------------------------------------|----------------------------------------------------------------------------------------------------------------|
|                                    |                                                       |                                                                  |                                                                                                                      |                                                                                               |                              |                                               |                                                                                                                                                                                                | house, use of oil and natural gas ovens, wind speed, ventilation                                               |
| <b>Batterman et al. 2007 [124]</b> | 15 households (single-family houses)                  | Ann Arbor, Ypsilanti; USA                                        | Garage, heating/cooling system, other activities                                                                     | VOCs                                                                                          | Varies from house to house   | April–July                                    | Mean concentrations ( $\mu\text{g}/\text{m}^3$ ):<br>VOCs: 12<br>benzene: 2.0<br>toluene: 26.5<br>ethylbenzene: 2.3<br>m,p-xylene: 8.3<br>o-xylene: 2.9<br>naphthalene: 8.3<br>CO2: 615.58 ppm | Configuration of house, attached garage, ventilation, air exchange rates, heating/cooling system               |
| <b>Batterman et al. 2012 [116]</b> | 288 households                                        | Ann Arbor (AA), Ypsilanti (YP), Dearborn (DB), Detroit (DT); USA | Repellent, deodorizer, exhaust and evaporative emissions in garages, tobacco smoke, wood combustion, incense burning | Naphthalene, environmental tobacco smoke (ETS), 2,5-dimethyl furan, 3-ethynyl pyridine (3-EP) | Living room, child's bedroom | 2004–2005 except DT (March 2009–October 2010) | Naphthalene mean concentration ( $\mu\text{g}/\text{m}^3$ ):<br>Overall: 5.4<br>AA: 3.5<br>YP: 5.6<br>DB: 2.3<br>DT: 7.8                                                                       | Not reported                                                                                                   |
| <b>Baxter et al. 2007 [159]</b>    | 43 households (single-family, multifamily, apartment) | Boston; USA                                                      | Cleaning, gas stove, smoking, humidifier, candle, cooking                                                            | NO2, PM2.5, EC                                                                                | Main living area             | Multiple seasons from 2003–2005               | Mean concentrations:<br>NO2: 19.6 ppb<br>PM2.5: 20.3 $\mu\text{g}/\text{m}^3$<br>EC: 0.57 $\times 10^{-5} \text{ m}^{-1}$                                                                      | Cooking duration, gas stove usage, occupant density, humidifier use, candle use, cleaning, natural ventilation |
| <b>Belanger et al. 2006 [63]</b>   | 242 households                                        | Connecticut, Massachusetts; USA                                  | Gas stoves, gas dryers, smoking, mould                                                                               | NO2                                                                                           | Not recorded                 | November–March; April–October                 | NO2 mean concentration (ppb):<br>Homes with electric ranges: 8.6<br>Homes with gas ranges: 25.9                                                                                                | Use of gas stoves, season, single or multifamily housing, smoking                                              |

|                                                      |                                                                                         |                                    |                                                                                                                 |                                                                                     |                                                                                                          |                                                                 |                                                                                                                           |                                                                                                                                                                                                                                                                                                                |
|------------------------------------------------------|-----------------------------------------------------------------------------------------|------------------------------------|-----------------------------------------------------------------------------------------------------------------|-------------------------------------------------------------------------------------|----------------------------------------------------------------------------------------------------------|-----------------------------------------------------------------|---------------------------------------------------------------------------------------------------------------------------|----------------------------------------------------------------------------------------------------------------------------------------------------------------------------------------------------------------------------------------------------------------------------------------------------------------|
| <b>Belanger et al.</b><br><b>2013</b><br><b>[57]</b> | 1342 households                                                                         | Connecticut,<br>Massachusetts; USA | Gas cooking,<br>smoking                                                                                         | NO2                                                                                 | Dayroom,<br>child's<br>bedroom                                                                           | 2006–2009<br>All seasons                                        | NO2 overall mean: 10.6 ppb                                                                                                | Living in<br>multifamily<br>housing,<br>ethnicity, level of<br>education, stove<br>type                                                                                                                                                                                                                        |
| <b>BéruBé et al.</b><br><b>2004</b><br><b>[42]</b>   | 6 households<br>(urban, suburban,<br>rural)                                             | Wales,<br>Cornwell;<br>UK          | Smoking, pets<br>cleaning restrictions,<br>heating                                                              | PM10                                                                                | Kitchen, living<br>room,<br>bedroom                                                                      | All four<br>seasons (1998–<br>1999)                             | PM10 overall annual mean<br>concentration:<br>25.52 µg/m <sup>3</sup>                                                     | Smoking,<br>cleaning,<br>temperature,<br>relative humidity                                                                                                                                                                                                                                                     |
| <b>Bhangar et al.</b><br><b>2011</b><br><b>[46]</b>  | 7 (single-family,<br>detached houses)                                                   | Alameda<br>County;<br>USA          | Heating, natural gas<br>furnace, electric<br>appliances, cleaners,<br>household activities,<br>cooking, candles | UFP, O3,<br>NO, CO2,<br>CO                                                          | Central<br>location, e.g.,<br>living or<br>dining room;<br>second<br>monitor in<br>different<br>location | All four<br>seasons,<br>November<br>2007–February<br>2009       | PNC GM:<br>14500 #/cm <sup>3</sup><br>PNC AM:<br>17000 #/cm <sup>3</sup>                                                  | Use of gas<br>appliances,<br>electric stove or<br>oven use, toaster<br>use, ironing<br>clothes,<br>microwave use,<br>using candles,<br>terpene-based<br>cleaning product<br>use, vacuum<br>cleaning,<br>sweeping,<br>clothes washing,<br>other electric<br>appliances, non-<br>terpene cleaning<br>product use |
| <b>Blanc et al.</b><br><b>2005</b><br><b>[7]</b>     | 226 households                                                                          | California;<br>USA                 | Pets, heating type,<br>carpets                                                                                  | CO, CO2,<br>NO2,<br>formaldehyde,<br>acrolein,<br>VOCs,<br>allergens,<br>endotoxins | Kitchen, living<br>room,<br>bedroom                                                                      | 1992, 1996,<br>1999                                             | Mean concentrations:<br>CO2: 760 ppm<br>CO: 0.3 ppm<br>NO2: 13 ppb<br>formaldehyde: 15 ppb                                | House dust,<br>presence of pets,<br>air filtration, wall<br>dampness, room<br>humidity, gas<br>stoves, wood<br>heating                                                                                                                                                                                         |
| <b>Brauer et al.</b><br><b>2000</b><br><b>[150]</b>  | 49 households<br>(apartment<br>buildings, semi-<br>detached houses,<br>detached houses) | Banska<br>Bystrica;<br>Slovakia    | Not reported                                                                                                    | PM10,<br>PM2.5,<br>SO4                                                              | Room people<br>reported<br>spending most<br>time in when<br>not sleeping                                 | Summer, June<br>1997–<br>September<br>1997; winter,<br>November | Mean concentrations in<br>summer, winter (µg/m <sup>3</sup> ):<br>PM10: 79, 66<br>PM2.5: 55, 53<br>SO4: not reported, 4.6 | Season, location                                                                                                                                                                                                                                                                                               |

|                                        |                                                 |                                                                                     |                                                   |                                                                  |                                                                                                                |                                                                                |                                                                                                                                                                                                      |                                                                                                                                                                                   |
|----------------------------------------|-------------------------------------------------|-------------------------------------------------------------------------------------|---------------------------------------------------|------------------------------------------------------------------|----------------------------------------------------------------------------------------------------------------|--------------------------------------------------------------------------------|------------------------------------------------------------------------------------------------------------------------------------------------------------------------------------------------------|-----------------------------------------------------------------------------------------------------------------------------------------------------------------------------------|
|                                        |                                                 |                                                                                     |                                                   |                                                                  |                                                                                                                | 1997–March<br>1998                                                             |                                                                                                                                                                                                      |                                                                                                                                                                                   |
| <b>Brown et al.<br/>2008<br/>[148]</b> | 25 households<br>(apartments)                   | Boston;<br>USA                                                                      | Cooking, gas stove,<br>heating system,<br>candles | SO <sub>4</sub> <sup>2-</sup> ,<br>PM <sub>2.5</sub> , EC        | Living room                                                                                                    | Winter,<br>November<br>1999–January<br>2000;<br>summer, June<br>2000–July 2000 | GM concentrations (µg/m <sup>3</sup> ):<br>SO <sub>4</sub> <sup>2-</sup> :<br>winter: 1.5<br>summer: 3.1<br>PM <sub>2.5</sub> :<br>winter: 10.1<br>summer: 12.0<br>EC:<br>winter: 1.9<br>summer: 1.5 | Infiltration rate,<br>season,<br>ventilation,<br>cleaning,<br>cooking, candle<br>burning, housing<br>characteristics,<br>ambient<br>concentrations,<br>heating system             |
| <b>Brown et al.<br/>2014<br/>[24]</b>  | 10 households (4<br>with OWF vs. 6<br>controls) | Connecticut<br>; USA                                                                | Outdoor wood<br>furnaces (OWF)                    | PNC<br>(PM <sub>2.5</sub> )<br>PNC<br>(PM <sub>0.5</sub> )       | Room exposed<br>to wood<br>smoke and<br>frequented by<br>family (i.e.,<br>bedroom,<br>living room or<br>study) | Winter<br>(January–<br>March) 2010                                             | PM <sub>2.5</sub> mean (#/m <sup>3</sup> )<br>OWF exposed: 0.302 ×10 <sup>6</sup><br>OWF control: 0.0718 ×10 <sup>6</sup>                                                                            | Vacuuming,<br>cooking and<br>smoking                                                                                                                                              |
| <b>Byun et al.<br/>2010<br/>[137]</b>  | 50 households<br>(mostly apartment<br>style)    | Ansan-city<br>(AS),<br>Siheung-<br>city (SH),<br>Seongnam-<br>city (SN);<br>Korea   | Cooking, cleaning,<br>smoking                     | PM <sub>10</sub>                                                 | Living room<br>and children's<br>bedroom                                                                       | July 2008–<br>September<br>2008                                                | PM <sub>10</sub> mean concentrations (µg/m <sup>3</sup> ):<br>Living rooms: 45.3<br>Children's bedrooms: 45.9                                                                                        | Region, parental<br>education, floor<br>of residence,<br>building age,<br>average monthly<br>household<br>expenses,<br>number of<br>children,<br>cooking,<br>cleaning,<br>smoking |
| <b>Cao et al. 2005<br/>[35]</b>        | 6 households<br>(urban, rural,<br>roadside)     | Tsim Sha<br>Tsui,<br>Tseung<br>Kwan O<br>Kamtin, Tai<br>Pol; Hong<br>Kong,<br>China | Smoking, cooking,<br>cleaning                     | PM <sub>2.5</sub> ,<br>organic<br>carbon,<br>elemental<br>carbon | Living room<br>or bedroom                                                                                      | March 2004–<br>April 2004                                                      | PM <sub>2.5</sub> mean concentration:<br>56.7 µg/m <sup>3</sup>                                                                                                                                      | Housing near<br>main road or<br>construction site                                                                                                                                 |

|                                  |                                                                |                      |                                                                                                             |                                                    |                                                                     |                                                                               |                                                                                                                                                                                                                           |                                                                                                                                                        |
|----------------------------------|----------------------------------------------------------------|----------------------|-------------------------------------------------------------------------------------------------------------|----------------------------------------------------|---------------------------------------------------------------------|-------------------------------------------------------------------------------|---------------------------------------------------------------------------------------------------------------------------------------------------------------------------------------------------------------------------|--------------------------------------------------------------------------------------------------------------------------------------------------------|
| <b>Chatzis et al. 2005 [153]</b> | 50 households (detached house, flat/apartment)                 | Athens; Greece       | Building materials, heating mode, solvents, adhesives, smoking                                              | Benzene                                            | Attached to volunteer's lapel and during night set in bedside table | September 1997–September 1998                                                 | Benzene concentration in six periods ( $\mu\text{g}/\text{m}^3$ ):<br>September: 13.4<br>December: 11.2<br>February: 10.2<br>April: 9.0<br>June: 5.4<br>September: 7.8                                                    | Season, wind speed, building materials, ventilation, proximity to busy road, smoking, heating mode, proximity to petrol station, house characteristics |
| <b>Chen et al. 2017 [43]</b>     | 1 students' dormitory (10th floor), 1 apartment (9th floor)    | Beijing; China       | Camphor pollution, cooking sources, outdoor pollution                                                       | PM2.5, PAHs                                        | Not reported                                                        | Four seasons, March 2015–January 2016                                         | Mean concentrations:<br>PM2.5: 43.8 $\mu\text{g}/\text{m}^3$<br>PAHs: 36.9 $\text{ng}/\text{m}^3$                                                                                                                         | Seasons, outdoor air, use of naphthalene                                                                                                               |
| <b>Cheng et al. 2016 [71]</b>    | 40 households (freestanding, single-story suburban residences) | Melbourne; Australia | Building materials, subfloor material, floor covering, domestic chemicals, cooking                          | VOCs, CO, CO2, PM2.5, PM10, NO2, O3                | Living room                                                         | Winter/spring/summer 2008 (August–December), summer/autumn 2009 (January–May) | Mean concentrations ( $\mu\text{g}/\text{m}^3$ ):<br>benzene: 1.3<br>toluene: 10.7<br>ethylbenzene: 1.2<br>p-xylene: 2.9<br>m-xylene: 1.2<br>o-xylene: 2.2<br>formaldehyde: 16.4<br>acetaldehyde: 7.6<br>naphthalene: 1.5 | Air conditioning, ventilation, presence of domestic chemicals, type of floor covering, dwelling age, proximity to major roads, outdoor air quality     |
| <b>Chi et al. 2016 [53]</b>      | 19 households                                                  | Taiwan               | Road traffic, cooking, smoking                                                                              | PM2.5, PM10                                        | Living room, bedroom, kitchen                                       | March 2014–May 2016                                                           | Mean concentrations ( $\mu\text{g}/\text{m}^3$ ):<br>PM2.5:<br>bedroom 104.7<br>kitchen 119.0<br>living room 104.7<br>PM10:<br>bedroom 104.6<br>kitchen 123.4<br>living room 114.6                                        | Not recorded                                                                                                                                           |
| <b>Chin et al. 2014 [73]</b>     | 126 Homes                                                      | Detroit; USA         | Smoking, air fresheners, moth crystals, building materials, solvents, inks, coatings, paint, perfume, oils, | 56 VOCs in total. Priority VOCs: benzene, toluene, | Child's bedroom main living area                                    | March 2009–September 2010<br>All seasons                                      | Mean concentrations ( $\mu\text{g}/\text{m}^3$ ):<br>benzene: 2.27<br>toluene: 11.62<br>ethylbenzene: 1.72<br>m/p-xylene: 6.34                                                                                            | Air exchange rate, season, in-house airflow and mixing, attached garage, age and                                                                       |

|                                    |                                                                                     |                             |                                            |                                                 |                               |                                                   |                                                                                                                                                                                                                     |                                                                                                                                                             |
|------------------------------------|-------------------------------------------------------------------------------------|-----------------------------|--------------------------------------------|-------------------------------------------------|-------------------------------|---------------------------------------------------|---------------------------------------------------------------------------------------------------------------------------------------------------------------------------------------------------------------------|-------------------------------------------------------------------------------------------------------------------------------------------------------------|
|                                    |                                                                                     |                             | adhesives, varnish, glues, pesticides      | ethylbenzene, m/p-xylene, o-xylene, naphthalene |                               |                                                   | o-xylene: 2.02<br>naphthalene: 7.88                                                                                                                                                                                 | condition of the house, outdoor sources, e.g., vehicle emissions                                                                                            |
| <b>Cibella et al. 2015 [61]</b>    | 323 households (detached house /condominium)                                        | Palermo; Italy              | Gas appliances, smoking, road traffic      | NO2                                             | Main living area              | Spring (April–May) and winter (January–February)  | NO2 mean concentrations ( $\mu\text{g}/\text{m}^3$ ):<br>spring: 31.9<br>winter: 32.2                                                                                                                               | Presence of gas appliances, second hand smoke, window opening, number of rooms, type of dwelling, floor of residence, number of years in property, crowding |
| <b>Cirillo et al. 2006 [114]</b>   | 30 households                                                                       | Campania; Italy             | heating, smoking                           | PAHs                                            | Not reported                  | December 2004                                     | PHA mean concentrations ( $\text{ng}/\text{m}^3$ ):<br>urban homes: 2.5<br>rural homes: 4.1                                                                                                                         | Contamination of PAHs in food, smoking, type of heating,                                                                                                    |
| <b>Clarisse et al. 2003 [100]</b>  | 61 households (flats with at least 3 separate rooms)                                | Paris and surrounds; France | Smoking                                    | 6 Aldehydes                                     | Kitchen, living room, bedroom | March 2001–June 2001; September 2001–October 2001 | GM concentrations ( $\mu\text{g}/\text{m}^3$ ) in kitchens, living rooms, and bedrooms:<br>formaldehyde: 21.7, 24.3, 24.5<br>acetaldehyde: 10.1, 10.0, 10.2<br>pentanal: 5.7, 6.0, 6.4<br>hexanal: 20.5, 23.8, 25.5 | Type of floor or wall coverings, refurbishment, building age, smoking, room type, ambient parameters                                                        |
| <b>Clougherty et al. 2011 [17]</b> | 43 households (mainly multifamily units, three to four story residential buildings) | Boston and surrounds; USA   | Cooking, cleaning, smoking, candle burning | NO2, PM2.5, BC                                  | Main living area              | Summer and winter, 2003–2005                      | Mean concentrations:<br>PM2.5: 20.1 $\mu\text{g}/\text{m}^3$<br>NO2: 19.1 ppb<br>BC: $0.58 \times 10^{-5} \text{ m}^{-1}$                                                                                           | Indoor combustion, cleaning, resuspension, natural ventilation, exhaust fan use                                                                             |
| <b>Colton et al. 2014 [130]</b>    | 61 households (43 conventional vs. 18 green, low-income public housing)             | Boston; USA                 | Smoking, cooking, candles, air freshener   | PM2.5, NO2, formaldehyde                        | Main living space             | 2012–2013 (season not recorded)                   | Geometric mean ( $\mu\text{g}/\text{m}^3$ ):<br>PM2.5 (total): 12.9<br>PM2.5 (conv.): 15.1<br>PM2.5 (green): 8.9<br>NO2 (total): 46.0                                                                               | Cooker type, smoking policy, air exchange rate                                                                                                              |

|                                         |                                              |                                              |                                                                                                  |                                    |                                                                          |                                                                    |                                                                                                                                 |                                                                                                                 |
|-----------------------------------------|----------------------------------------------|----------------------------------------------|--------------------------------------------------------------------------------------------------|------------------------------------|--------------------------------------------------------------------------|--------------------------------------------------------------------|---------------------------------------------------------------------------------------------------------------------------------|-----------------------------------------------------------------------------------------------------------------|
|                                         |                                              |                                              |                                                                                                  |                                    |                                                                          |                                                                    | NO2 (conv.): 63.2<br>NO2 (green): 21.4<br>formaldehyde (total): 10.2<br>formaldehyde (conv.): 9.4<br>formaldehyde (green): 12.1 |                                                                                                                 |
| <b>Coombs et al. 2016 [132]</b>         | 42 households (green units, non-green units) | Cincinnati, Ohio; USA                        | Building materials, renovation products, toilet deodorant, air freshener, nail polish, mothballs | PM2.5, BC, UFP, TVOC, formaldehyde | Child's or parents' bedroom                                              | Heating season, October–March; non-heating season, April–September | Median concentrations:<br>PM2.5: 41 µg/m³<br>BC: 0.98 µg/m³<br>UFP: 19000 #/cm³<br>TVOC: 1.28 µg/m³<br>formaldehyde: 24.6 µg/m³ | Frequency of opening windows, occupants activities                                                              |
| <b>Cortez-Lugo et al. 2008 [135]</b>    | 38 households                                | Mexico City; Mexico                          | Carpeting, aerosol spray, tobacco smoke                                                          | PM2.5, PM10                        | Area of the house where participants spend most time (excluding kitchen) | February 2000–November 2000                                        | Mean concentrations (µg/m³):<br>PM2.5: 32<br>PM10: 50                                                                           | Carpeting, using aerosol spray, boiler location, smoking and natural ventilation                                |
| <b>Custódio et al. 2014 [41]</b>        | 4 homes (1 terraced house, 3 apartments)     | Aveiro, São João da Madeira; Portugal        | Cooking, smoking, pets, fireplace                                                                | PM10                               | Kitchen                                                                  | January–March 2011, 2012                                           | PM10 mean concentration: 71.9 µg/m³                                                                                             | Natural ventilation, smoking                                                                                    |
| <b>Cyrys et al. 2000 [59]</b>           | 405 households                               | Hamburg, Erfurt; Germany                     | Heating, cooking, smoking                                                                        | NO2                                | Living room, bedroom                                                     | June 1995–November 1996                                            | NO2 median concentrations (µg/m³):<br>Erfurt: 15<br>Hamburg: 17                                                                 | Season, building materials, building age, type of heating, type of fuel used, gas cooking, ventilation, smoking |
| <b>Delfino et al. 2004 [52]</b>         | Not recorded                                 | Alpine, California; USA                      | Not recorded                                                                                     | PM2.5, PM10                        | Main living area                                                         | September 1999–October 1999; April 2000–June 2000                  | Mean concentrations (µg/m³):<br>PM2.5: 12.1<br>PM10: 30.3                                                                       | Not recorded                                                                                                    |
| <b>Delgado-Saborit et al. 2011 [68]</b> | 100 households                               | London, West Midlands, rural South Wales; UK | Tobacco smoke, candle/incense, fireplace, home activities                                        | 15 VOCs                            | Generally in the living room                                             | May 2005–May 2007                                                  | Mean concentrations (µg/m³):<br>benzene: 1.97<br>toluene: 17.53<br>ethylbenzene: 1.74<br>naphthalene: 0.79<br>p-xylene: 1.7     | Smoking, ventilation, use of cleaning products, building materials,                                             |

|                                      |                                                                                                  |                                                    |                                                                                                                                                                                                        |                                                    |                          |                                                                                                             |                                                                                                                                                                                                                                         |                                                                                                                                                                                                                              |
|--------------------------------------|--------------------------------------------------------------------------------------------------|----------------------------------------------------|--------------------------------------------------------------------------------------------------------------------------------------------------------------------------------------------------------|----------------------------------------------------|--------------------------|-------------------------------------------------------------------------------------------------------------|-----------------------------------------------------------------------------------------------------------------------------------------------------------------------------------------------------------------------------------------|------------------------------------------------------------------------------------------------------------------------------------------------------------------------------------------------------------------------------|
|                                      |                                                                                                  |                                                    |                                                                                                                                                                                                        |                                                    |                          |                                                                                                             | m-xylene: 4.14<br>o-xylene: 2.02                                                                                                                                                                                                        | garages<br>connected to the<br>main house,<br>season                                                                                                                                                                         |
|                                      |                                                                                                  |                                                    |                                                                                                                                                                                                        |                                                    |                          |                                                                                                             | Mean concentrations ( $\mu\text{g}/\text{m}^3$ )<br>benzene:<br>house 2.21<br>basement 2.98<br>toluene:<br>house 11.81<br>basement 21.75<br>naphthalene:<br>house 26.30<br>basement 17.19<br>limonene:<br>house 20.16<br>basement 16.60 | Heating and<br>cooling system,<br>no. of windows,<br>degree of wind<br>sheltering,<br>dimensions of<br>rooms, basement,<br>overall exterior<br>dimensions, no.<br>of floors, air flow<br>rates, interzonal<br>flows, smoking |
| Du et al. 2015<br>[82]               | 61 households                                                                                    | Detroit,<br>Michigan;<br>USA                       | Solvents, household<br>cleaners, air<br>fresheners, smoking,<br>gas-powered tool,<br>adhesives, paints,<br>lubricants, petrol,<br>wood products, nail<br>polish, perfume,<br>moth balls,<br>pesticides | Benzene,<br>toluene<br>naphthalene,<br>limonene    | Basement,<br>living area | All seasons<br>from August<br>2011–Dec<br>2011, and<br>seasonal<br>assessment<br>spaced 2–3<br>months apart |                                                                                                                                                                                                                                         |                                                                                                                                                                                                                              |
| Ferrero et al.<br>2017<br>[79]       | 352 households                                                                                   | Valencia;<br>Spain                                 | Heating, smoking,<br>solvent-based<br>paintings,<br>re-decoration<br>activities                                                                                                                        | Benzene                                            | Living room              | 2006–2007                                                                                                   | Benzene mean concentration:<br>1.46 $\mu\text{g}/\text{m}^3$                                                                                                                                                                            | Mothers age,<br>type of heating,<br>maternal country<br>of birth,<br>parental tobacco<br>consumption,<br>ventilation,<br>seasons                                                                                             |
| García Algar<br>et al. 2004<br>[141] | 1421 households                                                                                  | Ashford;<br>UK.<br>Menorca,<br>Barcelona;<br>Spain | Cooking, gas<br>combustion,<br>smoking                                                                                                                                                                 | NO2                                                | Living room              | November<br>1993–July<br>1995; 1996–<br>1998                                                                | NO2 median concentrations (ppb):<br>Ashford: 5.79<br>Menorca: 6.06<br>Barcelona: 23.87                                                                                                                                                  | Gas cooking,<br>smoking,<br>heating mode,<br>house location                                                                                                                                                                  |
| Gilbert et al.<br>2005<br>[102]      | 59 households<br>(trailer/mini home,<br>single detached<br>house, side-by-side<br>duplex, other) | Prince<br>Edward<br>Island;<br>Canada              | Smoking, type of<br>heating/heating fuel,<br>wood stove use,<br>varnishing, odours<br>of fresh paint, new<br>carpet, painting                                                                          | Formaldehyde,<br>acetaldehyde,<br>acrolein,<br>CO2 | Not recorded             | Winter 2002                                                                                                 | GM concentrations:<br>formaldehyde: 33.2 $\mu\text{g}/\text{m}^3$<br>CO2: 850 ppm<br>acetaldehyde: 20.2 $\mu\text{g}/\text{m}^3$<br>acrolein: 1.0 $\mu\text{g}/\text{m}^3$                                                              | Smoking, air<br>exchange rates,<br>absolute<br>humidity,<br>building age                                                                                                                                                     |
| Gilbert et al.<br>2006<br>[103]      | 96 households<br>(single-family<br>dwellings,<br>duplexes, triplexes)                            | Quebec<br>City;<br>Canada                          | Cooking appliances,<br>wood burning,<br>painting                                                                                                                                                       | NO2,<br>formaldehyde                               | Living room              | January 2005–<br>April 2005                                                                                 | GM concentrations ( $\mu\text{g}/\text{m}^3$ ):<br>formaldehyde: 29.5<br>NO2: 8.3                                                                                                                                                       | House type, air<br>exchange rate,<br>heating and<br>cooking systems,<br>garage,<br>ventilation                                                                                                                               |

|                                            |                                                           |                                                                 |                                                                                               |                    |                                              |                                  |                                                                                                       | building age,<br>heat distribution                                                                                  |
|--------------------------------------------|-----------------------------------------------------------|-----------------------------------------------------------------|-----------------------------------------------------------------------------------------------|--------------------|----------------------------------------------|----------------------------------|-------------------------------------------------------------------------------------------------------|---------------------------------------------------------------------------------------------------------------------|
| <b>Gillespie-Bennett et al. 2008 [128]</b> | 409 households                                            | Bluff, Dunedin, Christchurch, Porirua, Hutt Valley; New Zealand | Heating type, smoking,                                                                        | NO2                | Living room and bedroom of child with asthma | Winter, June–September 2006      | NO2 geometric mean concentrations: 11.4 µg/m <sup>3</sup>                                             | Heating type, smoking, ventilation, gas or electric stove use, open windows, gas or electric oven use               |
| <b>Gillespie-Bennett et al. 2011 [66]</b>  | 349 households                                            | Bluff, Dunedin, Christchurch, Porirua, Hutt Valley; New Zealand | Unflued gas heating                                                                           | NO2                | Living rooms                                 | Winter, June 2006–September 2006 | NO2 geometric mean concentration: 11.4 µg/m <sup>3</sup>                                              | heating systems, ambient air                                                                                        |
| <b>Gordian et al. 2010 [91]</b>            | 509 households (single-family homes with attached garage) | Anchorage; USA                                                  | gasoline-fuelled equipment, solvents and other items containing gasoline stored in the garage | VOCs               | Primary living space                         | November 2008–April 2009         | Median concentrations (ppb):<br>benzene: 2.88<br>toluene: 7.34<br>ethylbenzene: 0.83<br>xylenes: 3.01 | Small engines and gasoline stored in attached garages                                                               |
| <b>Guo et al. 2009 [89]</b>                | 100 households (houses, apartments and others)            | Hong Kong; China                                                | Building materials, furnishings                                                               | Formaldehyde, VOCs | Living room, if no living room, bedroom      | Winter 2002                      | Mean concentrations (µg/m <sup>3</sup> ):<br>formaldehyde: 112.3<br>VOCs: 46.1                        | Building age, pressed wood products, shoes inside the house, building type, number of people                        |
| <b>Gurley et al. 2013 [36]</b>             | 258 households                                            | Dhaka; Bangladesh                                               | Cooking fuel (biomass burning), smoking                                                       | PM2.5              | Child's bedroom                              | May 2009–April 2010              | PM2.5 mean concentration: 190 µg/m <sup>3</sup>                                                       | Ventilation, smoking, solid fuel (biomass burning), season                                                          |
| <b>Hansel et al. 2008 [64]</b>             | 150 households (mostly row homes)                         | Baltimore; USA                                                  | Cooking, heating, cleaning, smoking, air purifier, candle, incense                            | NO2, PM2.5         | Child's bedroom                              | All seasons                      | Mean concentrations:<br>NO2: 30.0 ppb<br>PM2.5: 40.3 µg/m <sup>3</sup>                                | Gas stove/heater use, sweeping, use of a space heater or oven, season, incense/candle burning, natural ventilation, |

|                                  |                                |                                                              |                                                                                                            |                                                             |                              |                                                                |                                                                                                                                                                                                                                                      |                                                                                                                                                                                      |
|----------------------------------|--------------------------------|--------------------------------------------------------------|------------------------------------------------------------------------------------------------------------|-------------------------------------------------------------|------------------------------|----------------------------------------------------------------|------------------------------------------------------------------------------------------------------------------------------------------------------------------------------------------------------------------------------------------------------|--------------------------------------------------------------------------------------------------------------------------------------------------------------------------------------|
|                                  |                                |                                                              |                                                                                                            |                                                             |                              |                                                                | PM2.5 mean ( $\mu\text{g}/\text{m}^3$ ):<br>bedroom: 11.4<br>living area: 12.2<br>NO2 mean (ppb):<br>bedroom: 10.8<br>living area: 12.2                                                                                                              | smoking, house location (near street or parking)                                                                                                                                     |
| <b>Hansel et al. 2013 [56]</b>   | 84 households                  | Baltimore; USA                                               | SHS, combustion sources                                                                                    | PM2.5, NO2                                                  | Bedroom, main living area    | Baseline, 3 months, 6 months                                   |                                                                                                                                                                                                                                                      | Room type, ventilation                                                                                                                                                               |
| <b>Harrison et al. 2009 [84]</b> | 100 households (houses, flats) | London, Birmingham, West midlands, South Wales; UK           | Solvents, cleaning, heating, cooking, redecorating, air fresheners, glue                                   | VOCs, PAHs                                                  | Living room                  | All seasons, May 2005–May 2007                                 | GM concentrations ( $\mu\text{g}/\text{m}^3$ ):<br>benzene: 1.5<br>toluene: 10.88<br>ethylbenzene: 1.17<br>p-xylene: 1.03<br>m-xylene: 2.55<br>o-xylene: 1.29<br>naphthalene: 0.52                                                                   | Outdoor air, heating, cooking, redecorating, using air fresheners, smoking, time spent in garage                                                                                     |
| <b>Héroux et al. 2010 [121]</b>  | 145 households                 | Regina; Canada                                               | New furniture, heating, air conditioning, cooking/cooking appliances, smoking, candles, perfume, hairspray | PM2.5, PM10–2.5, EC/OC, NO2, O3, CO, VOCs, and 43 aldehydes | Family or living room        | Winter, January 2007–March 2007; summer, July 2007–August 2007 | GM concentrations ( $\mu\text{g}/\text{m}^3$ ) in summer, winter:<br>formaldehyde: 31.08, 23.39<br>benzene: 1.28, 1.44<br>toluene: 11.26, 8.40<br>O3: 0.12, n/a<br>NO2: 8.51, n/a<br>PM2.5: 6.43, 5.46<br>acetaldehyde: 10.10, 9.74                  | Season, ventilation, new furniture/rug, attached garage, building age, off-gassing, air exchange rate, cooking with oil, smoking, gas stoves, using candles or perfume or hair spray |
| <b>Hu et al. 2017 [32]</b>       | 60 households                  | Harbin, Dalian, Beijing, Shanghai, Wuhan and Changsha; China | Outdoor pollution, redecoration, dampness, pets, low cleaning frequency of quilt                           | Acetaldehyde, PM2.5, formaldehyde, SVOC, TVOC               | Child's bedroom, living room | Winter 2013                                                    | PM2.5 mean concentrations ( $\mu\text{g}/\text{m}^3$ ):<br>Beijing: 71<br>Harbin: 60<br>Dalian: 36.5<br>Formaldehyde highest indoor concentrations ( $\mu\text{g}/\text{m}^3$ ):<br>Beijing: 42.6<br>Shanghai: 31.1<br>Wuhan: 45.2<br>Changsha: 11.4 | Time spent in living room and child's bedroom, poor natural ventilation, outdoor pollution                                                                                           |

|                                          |                                                                           |                                                       |                                            |                             |                                                                   |                                                                  |                                                                                                                                                                                                                           |                                                                                                                                                                              |
|------------------------------------------|---------------------------------------------------------------------------|-------------------------------------------------------|--------------------------------------------|-----------------------------|-------------------------------------------------------------------|------------------------------------------------------------------|---------------------------------------------------------------------------------------------------------------------------------------------------------------------------------------------------------------------------|------------------------------------------------------------------------------------------------------------------------------------------------------------------------------|
| <b>Hulin et al.<br/>2010<br/>[152]</b>   | 114 households                                                            | Clermont-Ferrand;<br>France                           | Not applicable to<br>this paper            | NO2,<br>PM2.5,<br>VOCs      | Living room                                                       | Summer and<br>winter<br>(urban),<br>summer<br>(rural)            | Median concentrations ( $\mu\text{g}/\text{m}^3$ ):<br>NO2: 10.5<br>PM2.5: 10.6<br>formaldehyde: 19.2<br>acetaldehyde: 13.6<br>benzene: 1.8<br>toluene: 20.2<br>ethylbenzene: 2.9<br>xylenes: 10.3                        | Season, urban<br>versus rural<br>location,<br>ventilation, way<br>of living, outdoor<br>pollution                                                                            |
| <b>Jafta et al.<br/>2017<br/>[122]</b>   | 114 households<br>(houses,<br>apartments, and<br>informal shacks)         | Durban;<br>South<br>Africa                            | Cooking, smoking,<br>incense               | NO2,<br>PM10,<br>SO2        | Living room<br>or sleeping<br>area                                | Warm season,<br>September–<br>May;<br>cold season<br>June–August | Mean concentrations ( $\mu\text{g}/\text{m}^3$ ):<br>NO2: 19<br>PM10: 64<br>SO2: 0.6                                                                                                                                      | Type of housing,<br>cooking fuel<br>type, distance to<br>roadway,<br>ventilation,<br>season                                                                                  |
| <b>Jones et al.<br/>2007<br/>[154]</b>   | 78 households                                                             | Not<br>reported                                       | Smoking, incense,<br>pets, carpet, cooking | PM10,<br>PM2.5,<br>PM total | Living room<br>and bedroom                                        | Not reported                                                     | Mean concentrations in the living room<br>at 0.2m and 1.4m from ground, and in<br>bedroom ( $\mu\text{g}/\text{m}^3$ ):<br>PM: 20.6, 21.7, 20.5<br>PM10: 13.2, 14.3, 13.2<br>PM2.5: 7.8, 8.0, 7.5                         | Floor level,<br>smoking, incense<br>burning,<br>presence of pets,<br>carpet, distance<br>between houses<br>and major<br>boulevards,<br>separated<br>kitchen, cooking<br>time |
| <b>Jones et al.<br/>2000<br/>[29]</b>    | 9 households<br>(roadside homes,<br>urban flats, rural<br>country houses) | Birmingham,<br>Oxfordshire,<br>Worcesters<br>hire; UK | Smoking                                    | PM10,<br>PM2.5,<br>PM1      | Ground floor                                                      | 1997                                                             | I/O ratio greater than 1 for all sites                                                                                                                                                                                    | Cooking (electric<br>appliance),<br>cleaning,<br>air exchange<br>rates, ventilation                                                                                          |
| <b>Jung et al.<br/>2012<br/>[51]</b>     | 408 households                                                            | New York<br>City; USA                                 | Space heating                              | PM2.5, BC                   | In the room<br>the child spent<br>the majority of<br>her/his time | October 2005–<br>May 2011                                        | PM2.5 median concentrations ( $\mu\text{g}/\text{m}^3$ ):<br>new wheeze group: 12.2<br>reference group: 13.8<br>BC median concentrations ( $\mu\text{g}/\text{m}^3$ ):<br>new wheeze group: 1.42<br>reference group: 1.50 | Traffic emissions<br>penetrated from<br>outside, heating,<br>season                                                                                                          |
| <b>Jurvelin et al.<br/>2003<br/>[87]</b> | 15 households<br>(single-family<br>house, apartments,<br>attached houses) | Helsinki;<br>Finland                                  | Home appliances,<br>cosmetics, smoking     | Carbonyls                   | Carried out by<br>participants                                    | May 1997–<br>September<br>1997                                   | Mean concentrations ( $\mu\text{g}/\text{m}^3$ ):<br>formaldehyde: 33.3<br>acetaldehyde: 10.1                                                                                                                             | Building<br>products<br>emissions,<br>cleaning                                                                                                                               |

|                                          |                                                                                                                     |                                                                                                               |                                                                                                                                        |                               |                                                                                                  |                                                             |                                                                                                                                                            |                                                                                                                                   |
|------------------------------------------|---------------------------------------------------------------------------------------------------------------------|---------------------------------------------------------------------------------------------------------------|----------------------------------------------------------------------------------------------------------------------------------------|-------------------------------|--------------------------------------------------------------------------------------------------|-------------------------------------------------------------|------------------------------------------------------------------------------------------------------------------------------------------------------------|-----------------------------------------------------------------------------------------------------------------------------------|
| <b>Karottki et al.<br/>2015<br/>[45]</b> | 27 apartments                                                                                                       | Copenhagen;<br>Denmark                                                                                        | Not reported                                                                                                                           | PM2.5,<br>PNC (10–<br>300 nm) | Living room,<br>bedroom                                                                          | November<br>2010–May<br>2011                                | PM2.5 median concentrations (µg/m³):<br>living room: 6.3<br>bedroom: 6.3<br>PNC median concentration:<br>7100/cm³                                          | Not reported                                                                                                                      |
| <b>Kattan et al.<br/>2007<br/>[65]</b>   | 469 households                                                                                                      | Baltimore,<br>Bronx,<br>Chicago,<br>Cleveland,<br>Detroit,<br>New York,<br>St Louis,<br>Washington<br>DC; USA | Gas stove, smoking                                                                                                                     | NO2                           | Child's<br>bedroom                                                                               | February–July                                               | NO2 median concentration:<br>29.8 ppb                                                                                                                      | Gas/ electric<br>stove, location<br>(city), season<br>(average<br>monthly temp),<br>month, smoking,<br>presence of stove<br>vents |
| <b>Kennedy et al.<br/>2009<br/>[112]</b> | 1 household (9 km<br>from the central<br>business district)                                                         | Brisbane;<br>Australia                                                                                        | Intermittent wood<br>smoke                                                                                                             | PAHs                          | Not reported                                                                                     | June–August<br>2007                                         | Indoor concentrations (µg/m³):<br>fluorene: <0.03<br>phenanthrene: 1.2<br>fluoranthene: 0.45<br>pyrene: 0.25<br>benz(a)anthracene: <0.03<br>chrysene: 0.03 | Intermittent<br>wood smoke                                                                                                        |
| <b>Khoder et al.<br/>2000<br/>[146]</b>  | 7 households (flats)                                                                                                | Greater<br>Cairo;<br>Egypt                                                                                    | Smoking, petroleum<br>fuel                                                                                                             | Formaldeh<br>yde              | Kitchens,<br>bedrooms,<br>living rooms                                                           | Spring,<br>March–May<br>1999; summer<br>June–August<br>1999 | Formaldehyde mean concentrations<br>(µg/m³):<br>kitchens: 89<br>bedrooms: 100<br>living rooms: 100                                                         | Building age,<br>building<br>materials,<br>seasons, air<br>temperature,<br>relative<br>humidity,<br>smoking                       |
| <b>King et al.<br/>2010<br/>[157]</b>    | 30 households<br>(multiunit housing)                                                                                | Buffalo;<br>USA                                                                                               | Smoking, cooking,<br>pyrolysis (candle<br>burning or non-<br>tobacco smoking<br>event),<br>electrical appliances                       | PM2.5                         | Living room,<br>shared<br>hallway<br>between<br>participating<br>units                           | July 2008–<br>August 2009                                   | Median concentrations (µg/m³):<br>smoke-permitted units: 20.2<br>smoke-free units: 8.3<br>hallways: 16.6                                                   | Smoking, rest not<br>discussed                                                                                                    |
| <b>Klepeis et al.<br/>2017<br/>[127]</b> | 290 households<br>(mix of detached<br>houses, apartment/<br>condo, townhouse,<br>duplex,<br>trailer/mobile<br>home) | San Diego,<br>California;<br>USA                                                                              | Smoking, cooking<br>and cooling fuel,<br>heating (wood or<br>gas), cleaning, using<br>aerosol spray<br>products, candles or<br>incense | PM0.5–2.5<br>as PNC           | Room closest<br>to usual<br>cigarette<br>smoking<br>location (as<br>reported by<br>participants) | Not reported                                                | PNC range of observed weekly mean:<br>556– 28400 counts per 0.01 cubic feet                                                                                | Ventilation<br>activities,<br>housing<br>characteristics,<br>particle<br>generating<br>activities                                 |

|                                      |                                                                                                        |                                      |                                        |                                       |                                                                                                                      |                                                            |                                                                                                                                                                                                                                |                                                                                 |
|--------------------------------------|--------------------------------------------------------------------------------------------------------|--------------------------------------|----------------------------------------|---------------------------------------|----------------------------------------------------------------------------------------------------------------------|------------------------------------------------------------|--------------------------------------------------------------------------------------------------------------------------------------------------------------------------------------------------------------------------------|---------------------------------------------------------------------------------|
| <b>Kliucininkas et al. 2011 [75]</b> | Location 1: 3rd floor, 5 storey university dormitory<br>Location 2: 1st floor of a university building | Kaunas; Lithuania                    | Not reported                           | PM2.5, PM10, PM4, PAHs, VOCs          | Location 1: indoor site inside a room, 3rd floor<br>Location 2: storage facility, 1st floor of a university building | Winter and spring, January–February 2009; March–April 2009 | Mean concentrations ( $\mu\text{g}/\text{m}^3$ ):<br>PM2.5: 29.57<br>PAH: 53.9<br>naphthalene: 0.12<br>ethylbenzene: 0.22<br>benzene: 0.63<br>toluene: 3.0<br>m-p-o-xylenes: 1.13                                              | Season, traffic intensity, heating system                                       |
| <b>Kornartit et al. 2010 [58]</b>    | 60 households                                                                                          | Hertfordshire; UK                    | Cooking, smoking                       | NO2                                   | Living room, bedroom, kitchen                                                                                        | Winter 2000, summer 2001                                   | NO2 mean concentration (ppb):<br>bedrooms: 9.1<br>living rooms: 10.5<br>kitchens: 13.1                                                                                                                                         | Gas cooking, cooking with electric cookers, smoking                             |
| <b>Kovesi et al. 2006 [138]</b>      | 20 households (single story, raised above ground level)                                                | Nunavut; Canada                      | Tobacco smoke, furnaces and fuel type  | CO2, NO2, PM                          | Not reported                                                                                                         | January 2003–March 2003 (extremely cold weather)           | Mean concentrations:<br>CO2: 1201 ppm<br>NO2: 5.6 ppb<br>PM: 167872 per cubic foot                                                                                                                                             | Nicotine concentration, number of occupants in the home, ventilation rates      |
| <b>Kulshreshtha et al. 2008 [39]</b> | 5 households (flats, independent houses)                                                               | Delhi; India                         | Household fuel                         | PM10, PM2.5, PM1.0, CO2, CO, SO2, NOx | Kitchen                                                                                                              | April 2004–September 2004; December 2004–February 2005     | Mean concentrations:<br>PM10: 386 $\mu\text{g}/\text{m}^3$<br>PM2.5: 233.33 $\mu\text{g}/\text{m}^3$<br>CO2: 847 ppb<br>NOx: 144 $\mu\text{g}/\text{m}^3$<br>CO: 4 $\text{mg}/\text{m}^3$<br>SO2: 133 $\mu\text{g}/\text{m}^3$ | Usage of gas and kerosene stoves, seasons                                       |
| <b>Kwon et al. 2015 [94]</b>         | 257 households with infants                                                                            | Seoul, Cheonan, Ulsan regions; Korea | Pet, air freshener                     | TVOC                                  | Infant's bedroom                                                                                                     | Not reported                                               | TVOC mean concentration: 174.7 $\mu\text{g}/\text{m}^3$                                                                                                                                                                        | Location (urban, rural, industrial), smoking                                    |
| <b>Lai et al. 2010 [33]</b>          | 9 households                                                                                           | Guangzhou; China                     | Smoking, cooking fuel                  | PM 2.5                                | Middle of each residence                                                                                             | June 2003–July 2003                                        | PM2.5 mean concentration: 47.4 $\mu\text{g}/\text{m}^3$                                                                                                                                                                        | Age. Air condition, natural ventilation, remodelling, LPG cooking fuel, smoking |
| <b>Lai et al. 2004 [2]</b>           | 50 households (units)                                                                                  | Oxford; UK                           | Smoking, cooking, heating, glue, paint | PM2.5, VOC, NO2, CO                   | Unspecified                                                                                                          | December 1998–February 2000                                | GM concentrations ( $\mu\text{g}/\text{m}^3$ ):<br>PM2.5: 11.4                                                                                                                                                                 | Gas cooking, smoking, glue usage, painting                                      |

|                                   |                                                                     |                          |                                                                                                                                                               |                                                                                         |                                         |                                    |                                                                                                                                                        |                                                                                                                                                            |
|-----------------------------------|---------------------------------------------------------------------|--------------------------|---------------------------------------------------------------------------------------------------------------------------------------------------------------|-----------------------------------------------------------------------------------------|-----------------------------------------|------------------------------------|--------------------------------------------------------------------------------------------------------------------------------------------------------|------------------------------------------------------------------------------------------------------------------------------------------------------------|
|                                   |                                                                     |                          |                                                                                                                                                               |                                                                                         |                                         |                                    | NO2: 22.3<br>TVOC: 194                                                                                                                                 | cultural practices, wind speed, renovation, ventilation                                                                                                    |
| <b>Lajoie et al. 2015 [27]</b>    | 83 households (bungalow, cottage, twin duplex, triplex, quadruplex) | Quebec City; Canada      | Not reported                                                                                                                                                  | Formaldehyde, NO2, CO2, VOCs                                                            | Child's bedroom                         | October 2008–June 2011             | Formaldehyde: 37.0 µg/m³<br>NO2: 3.4 µg/m³<br>CO2: 905.5 ppm<br>PM2.5: 1.68 µg/m³<br>toluene: 20.0 µg/m³                                               | Ventilation                                                                                                                                                |
| <b>Lawrence et al. 2005 [144]</b> | 15 households (grass/bamboo homes to high population brick houses)  | Agra; India              | Not reported                                                                                                                                                  | CO, NO2, NO, NOx                                                                        | Living room                             | Winter, October 2002–February 2003 | Mean rural and urban concentrations (ppb):<br>CO: 1150, 1220<br>NO: 227.5, 385<br>NO2: 230.75, 255<br>NOx: 458.25, 640                                 | Building age, distance from road, traffic, green area, ventilation, cleaning, fuel type, heating source, frequency of incense burning, cooking oil, season |
| <b>Lee et al. 2002 [120]</b>      | 119 households                                                      | Southern California; USA | Combustion sources, cooking, heating                                                                                                                          | HONO, NO2, O3                                                                           | Living room                             | April 1996–May 1996                | Mean concentrations (ppb):<br>HONO: 4.6<br>NO2: 28.0<br>O3: 14.9                                                                                       | Air conditioner use, humidifier use, presence of gas range, natural ventilation                                                                            |
| <b>Lee et al. 2014 [78]</b>       | 150 households                                                      | Seoul; Korea             | Floor covering, renovations, new furniture/electronics, vacuuming, heating fuel, artificial air freshener, insecticides, air-purifying indoor plants, smoking | PM10, formaldehyde, CO2, CO, NO2, TVOC, benzene, toluene, ethylbenzene, xylene, styrene | Living room, also child's room for VOCs | March 2008–April 2010              | Mean (µg/m³)<br>PM10: 66.3<br>formaldehyde: 75.6<br>TVOC: 648.2<br>benzene: 2.8<br>toluene: 95.3<br>ethylbenzene: 5.7<br>xylenes: 10.6<br>styrene: 3.5 | House construction year, building type, ventilation, presence of mould, use of artificial air freshener                                                    |
| <b>Lévesque et al. 2001 [37]</b>  | 89 households (single-family homes, duplexes,                       | Quebec City; Canada      | Wood heating, pets, mould, chemicals, ventilation                                                                                                             | NO2, PM10, CO,                                                                          | Room where combustion appliances are    | December 1995–March 1996           | Mean concentrations in the basement and ground floor:<br>NO2: 6.4 and 7.0 ppb                                                                          | Room type, heating mode, cooking                                                                                                                           |

|                                           | mobile home,<br>townhouse,<br>modular home)                                  |                                              |                                                                                     | formaldeh<br>yde                      | present and<br>living room          |                                                                                                      | Formaldehyde: 7.5 and 8.5 µg/m <sup>3</sup><br>Large number of PM10 and CO were<br>< detection limit                                                                                              |                                                                                                                                                                                                                |
|-------------------------------------------|------------------------------------------------------------------------------|----------------------------------------------|-------------------------------------------------------------------------------------|---------------------------------------|-------------------------------------|------------------------------------------------------------------------------------------------------|---------------------------------------------------------------------------------------------------------------------------------------------------------------------------------------------------|----------------------------------------------------------------------------------------------------------------------------------------------------------------------------------------------------------------|
| <b>Li et al. 2016<br/>[34]</b>            | Heating season: 53<br>households;<br>non-heating<br>season: 54<br>households | Lanzhou;<br>China                            | Cooking fuels (coal,<br>gas and electricity),<br>ingression of<br>outdoor pollution | PM2.5                                 | bedroom,<br>kitchen                 | Heating<br>season,<br>February<br>2013–March<br>2013;<br>non-heating<br>season,<br>September<br>2013 | PM2.5 mean concentrations (µg/m <sup>3</sup> ):<br>Heating season:<br>kitchen: 125<br>bedroom: 119<br>Non-heating season:<br>kitchen: 80<br>bedroom: 80                                           | Type of cooking<br>fuel, space<br>heating, food<br>preparation<br>(boiled, frying,<br>etc.), cooking<br>frequency,<br>smokers present,<br>window<br>opening, air<br>exchange<br>between kitchen<br>and bedroom |
| <b>Liu et al.<br/>2001<br/>[110]</b>      | 8 households<br>(multistorey<br>apartment/flats)                             | Hangzhou;<br>China                           | Smoking, heating<br>mode, cooking<br>appliances                                     | 12 PAHs                               | Bedroom,<br>kitchen, living<br>room | Summer, July<br>1999; Autumn<br>November<br>1999                                                     | PAHs geometric mean concentrations<br>(ng/m <sup>3</sup> ):<br>summer: 6485<br>autumn: 9568                                                                                                       | Combustion fuel<br>type, cooking<br>process,<br>ventilation, use<br>of mothballs,<br>smoking                                                                                                                   |
| <b>Lovreglio et<br/>al. 2009<br/>[97]</b> | 59 households                                                                | Bari; Italy                                  | New or restored<br>furniture, smoking                                               | Formaldeh<br>yde,<br>acetaldehy<br>de | Kitchen                             | January–June<br>2008                                                                                 | Mean concentrations (µg/m <sup>3</sup> ):<br>formaldehyde: 16.0<br>acetaldehyde: 10.7                                                                                                             | New or restored<br>furniture,<br>smoking, natural<br>ventilation,<br>season                                                                                                                                    |
| <b>Lu et al.<br/>2011<br/>[113]</b>       | 71 households                                                                | Hangzhou;<br>China<br>Shizuoka;<br>Japan     | Smoking, cooking,<br>heating, mothballs,<br>insect repellent                        | 8 PAHs                                | Main living<br>area                 | Summer<br>(August 2006)<br>and<br>winter<br>(January 2007)                                           | Total PHA mean concentrations in<br>Hangzhou (ng/m <sup>3</sup> ):<br>summer: 47<br>winter: 40<br>Total PAH mean concentration in<br>Shizuoka (ng/m <sup>3</sup> ):<br>summer: 5.2<br>winter: 6.1 | Presence of<br>smoking,<br>kerosene heating,<br>using mothballs<br>and insect<br>repellent,<br>cooking<br>practices, house<br>age and outdoor<br>environment                                                   |
| <b>Lung et al.<br/>2007<br/>[133]</b>     | 45 households                                                                | Taipei,<br>Taichung,<br>Kaohsiung;<br>Taiwan | Cooking, incense<br>burning, smoking,<br>housing conditions                         | PM10                                  | Living room                         | November<br>1998–February<br>1999                                                                    | PM10 GM concentration:<br>73.4 µg/m <sup>3</sup>                                                                                                                                                  | Cooking type<br>and time,<br>separated<br>kitchen, incense<br>burning,                                                                                                                                         |

|                                    |                                                                                                           |                    |                                                               |                                                                    |                                                                  |                                                              |                                                                                                                                                                                                                              |                                                                                                                                                   |
|------------------------------------|-----------------------------------------------------------------------------------------------------------|--------------------|---------------------------------------------------------------|--------------------------------------------------------------------|------------------------------------------------------------------|--------------------------------------------------------------|------------------------------------------------------------------------------------------------------------------------------------------------------------------------------------------------------------------------------|---------------------------------------------------------------------------------------------------------------------------------------------------|
|                                    |                                                                                                           |                    |                                                               |                                                                    |                                                                  |                                                              |                                                                                                                                                                                                                              | smoking, floor level, carpet, presence of pets, distance between house and major boulevards                                                       |
| <b>MacNeill et al. 2014 [18]</b>   | 50 households (detached, row house, duplex/triplex).                                                      | Halifax; Canada    | Cooking, heating, cleaning                                    | PM2.5                                                              | Living room                                                      | Winter, January 2009–April; summer, June 2009–September 2009 | PM2.5 median concentrations ( $\mu\text{g}/\text{m}^3$ ): winter: 6.78 summer: 10.10                                                                                                                                         | Cooking, candle use<br>Wood fireplace use<br>no. of windows open, attached garage building age, stove type, carpet, air exchange rates            |
| <b>Madureira et al. 2016. [93]</b> | 68 households (mainly apartments): 38 homes of children with asthma (cases), 30 with no asthma (controls) | Porto; Portugal    | Floor and wall coverings, cooking, smoking, cleaning          | VOCs, PM2.5, PM10, CO2                                             | Child's bedroom                                                  | Winter, October–April                                        | Cases vs. controls median concentrations ( $\mu\text{g}/\text{m}^3$ ): PM2.5: 54 vs. 67 PM10: 56 vs. 71 d-limonene: 10.6 vs. 15.6                                                                                            | Cleaning frequency, living conditions, proximity to heavy traffic roads, attached garages, outdoor air flow rates, proximity to gasoline stations |
| <b>Marchand et al. 2006 [96]</b>   | 22 households (houses and flats)                                                                          | Strasbourg; France | Building materials, smoking, unvented fuel-burning appliances | Formaldehyde, acetaldehyde, propionaldehyde, benzaldehyde, hexanal | Bedroom, living/dining room                                      | June 2004–September 2004<br>September 2004–January 2005      | Mean concentrations ( $\mu\text{g}/\text{m}^3$ ) in living rooms, bedrooms: formaldehyde: 35.7, 46.1 acetaldehyde: 18.1, 18.2                                                                                                | Ventilation, smoking building age, building materials used (eg plywood floor), kerosene space heaters                                             |
| <b>Maruo et al. 2010 [98]</b>      | 34 households (houses, apartments)                                                                        | Kanto area; Japan  | Air condition, smoking                                        | Formaldehyde                                                       | Occupants chose location where they wished to know concentration | September 2007–October 2007                                  | 5–6-year-old houses had the highest concentration of formaldehyde followed by 3–5-year-old houses, 0–2-year-old houses. 16–30-year-old houses had the lowest concentration of formaldehyde. Mean formaldehyde concentrations | Temperature, window opening and air cleaners, renovations, smoking                                                                                |

| measured in apartments decrease as the time after renovation increased. |                                                                             |                     |                                                                                                          |                           |                      |                                                                                         |                                                                                                                                                                                                                                                                      |                                                                                                                                                    |
|-------------------------------------------------------------------------|-----------------------------------------------------------------------------|---------------------|----------------------------------------------------------------------------------------------------------|---------------------------|----------------------|-----------------------------------------------------------------------------------------|----------------------------------------------------------------------------------------------------------------------------------------------------------------------------------------------------------------------------------------------------------------------|----------------------------------------------------------------------------------------------------------------------------------------------------|
| Masih et al. 2010 [118]                                                 | 10 households                                                               | Agra; India         | Gas appliances, cooking, smoking, incense                                                                | PAHs, VOCs                | Living room, kitchen | Winter, November 2006–February 2007                                                     | TPAHs mean concentration (ng/m <sup>3</sup> ):<br>urban site: 1946.84<br>roadside site: 2824.87                                                                                                                                                                      | Using gas utilities, cooking process, smoking, incense burning, using oil/ghee                                                                     |
| Massey et al. 2012 [142]                                                | 10 households (roadside and urban locations)                                | Agra; India         | Cooking smoking                                                                                          | PM10, PM5.0, PM2.5, PM1.0 | Living room          | October 2007–March 2009                                                                 | Mean concentrations (µg/m <sup>3</sup> ) at roadside houses, urban houses:<br>PM10: 247, 181<br>PM5.0: 211, 145<br>PM2.5: 161, 109<br>PM1.0: 111, 99                                                                                                                 | Natural ventilation, ventilation, cooking on stove, smoking, wind speed, humidity, waste management                                                |
| McCormack et al. 2008 [134]                                             | 300 households (mainly row homes)                                           | Baltimore; USA      | Smoking, stove, oven, burned food, sweeping, vacuuming, air conditioning, air purifier, candles, incense | PM2.5, PM10               | Child's bedroom      | All seasons, September 2001–December 2003                                               | Mean concentrations (µg/m <sup>3</sup> ):<br>PM2.5: 39.5<br>PM10: 56.2                                                                                                                                                                                               | Smoking, stove use, oven use, sweeping, vacuuming, air conditioning, air purifier use, candles/incense burning, natural ventilation, space heating |
| McCormack et al. 2009 [49]                                              | 150 households                                                              | Baltimore; USA      | Smoking, stove, oven, burned food, sweeping, vacuuming, air conditioning, air purifier, candles/incense  | PM2.5–10, PM 2.5          | Child's bedroom      | All seasons, September 2001–December 2003                                               | Mean concentrations (µg/m <sup>3</sup> ):<br>PM2.5–10: 17.4<br>PM2.5: 40.3                                                                                                                                                                                           | Season, smoking, cooking, air purifier use, candle/incense use, cleaning                                                                           |
| McCormack et al. 2011 [50]                                              | 133 households (majority were row houses in close proximity to the roadway) | East Baltimore; USA | Smoking, cooking and cleaning activities                                                                 | PM10–2.5, PM2.5           | Child's bedroom      | baseline, 3 months and 6 months so different seasons covered and grouped together here. | PM2.5–10 median concentrations (µg/m <sup>3</sup> ):<br>children with nonatopic asthma: 13.4<br>children with atopic asthma: 11.6<br>PM2.5 median concentrations (µg/m <sup>3</sup> ):<br>children with non-atopic asthma: 35.7<br>children with atopic asthma: 27.6 | Not applicable to this paper                                                                                                                       |

|                                   |                                                                  |                                 |                                                 |                                          |                                                         |                                                                                    |                                                                                                                                                                                                                                                                   |                                                                                                                    |
|-----------------------------------|------------------------------------------------------------------|---------------------------------|-------------------------------------------------|------------------------------------------|---------------------------------------------------------|------------------------------------------------------------------------------------|-------------------------------------------------------------------------------------------------------------------------------------------------------------------------------------------------------------------------------------------------------------------|--------------------------------------------------------------------------------------------------------------------|
| McNamara et al. 2013 [25]         | 50 households                                                    | Missoula; USA                   | Wood stove, pets                                | PM2.5, PM10–2.5                          | Living area                                             | 2 winters, 7 homes: November 2010–March 2011<br>43 homes: November 2011–March 2012 | Mean concentrations ( $\mu\text{g}/\text{m}^3$ ):<br>PM10–2.5: 12.9<br>PM2.5: 32.3                                                                                                                                                                                | Number of pets, home size, use of wood stove, no of times the stove was stoked                                     |
| Mills et al. 2012 [26]            | 54 households (house, bungalow, flats with/without shared entry) | Aberdeen; UK                    | SHS                                             | PM2.5                                    | Living or room in which participants spent most time in | Not reported                                                                       | PM2.5 GM: 22 $\mu\text{g}/\text{m}^3$                                                                                                                                                                                                                             | Household smoking restrictions                                                                                     |
| Mohammadyan and Ashmore 2005 [19] | 40 households                                                    | Bradford; UK                    | Not reported                                    | PM2.5                                    | Not applicable to this study                            | Summer and winter                                                                  | GM concentration PM2.5: 19.0 $\mu\text{g}/\text{m}^3$                                                                                                                                                                                                             | Air exchange rate, temperature, natural ventilation                                                                |
| Morawska et al. 2011 [38]         | 167 households                                                   | Vientiane, Bolikhamxay; Lao PDR | Cooking and heating (wood), smoking, soil floor | PM10, CO, NO2                            | Living area                                             | December 2005–April 2006                                                           | Mean concentrations in Bolikhamxay:<br>PM10: 1183 $\mu\text{g}/\text{m}^3$<br>CO: 0.49 ppm<br>NO2: 561 $\mu\text{g}/\text{m}^3$<br>Mean concentrations in Vientiane:<br>PM10: 1275 $\mu\text{g}/\text{m}^3$<br>CO: 0.43 ppm<br>NO2: 1210 $\mu\text{g}/\text{m}^3$ | Smoking, presence of chimney, resuspension of dust from soil floors, building materials, cooking fuel type, season |
| Mullen et al. 2016 [60]           | 352 homes                                                        | California; USA                 | Gas appliances                                  | CO, NO2, NOx, formaldehyde, acetaldehyde | Kitchen, bedrooms                                       | November 2011–April 2012, October 2012–March 2013                                  | CO (ppm)<br>kitchen highest 8-h: 3.4<br>kitchen highest 1-h: 6.4<br>NO2 (ppb)<br>kitchen: 23<br>bedroom: 18<br>NOx (ppb)<br>kitchen: 73<br>bedroom: 65<br>Formaldehyde (ppb)<br>kitchen: 17<br>bedroom: 17<br>Acetaldehyde (ppb)                                  | Gas appliance type, cooking with gas (amount), presence of pilot light, ventilation, home size                     |

|                              |                                                                                                                                    |                                             |                                                              |                        |                         |                                                  |                                                                                                                                                                                  |                                                                                                                                      |
|------------------------------|------------------------------------------------------------------------------------------------------------------------------------|---------------------------------------------|--------------------------------------------------------------|------------------------|-------------------------|--------------------------------------------------|----------------------------------------------------------------------------------------------------------------------------------------------------------------------------------|--------------------------------------------------------------------------------------------------------------------------------------|
|                              |                                                                                                                                    |                                             |                                                              |                        |                         |                                                  | kitchen: 9.7<br>bedroom: 9.7                                                                                                                                                     |                                                                                                                                      |
| Nasir and Colbeck 2013 [155] | 11 households (single room in shared multistorey accommodation, single bedroom flats in 3 storey buildings, 2 or 3 bedroom houses) | Colchester; UK                              | Smoking, cooking, heating type, cleaning, movement           | PM10, PM2.5, PM1       | Living room, kitchen    | 2004–2008                                        | Mean 24 h concentrations ( $\mu\text{g}/\text{m}^3$ ) in kitchen type I, II, III residences:<br>PM10: 63, 59, 30<br>PM2.5: 56, 46, 10<br>PM1: 51, 37, 5<br>PM10–PM2.5: 7, 13, 20 | House size and relative occupancy, open house layout, smoking, wood burning, cooking, cleaning, ventilation, outdoor sources, season |
| Nazariah et al. 2013 [149]   | 212 households (villa, apartment, single storey terrace, double storey terrace, village)                                           | Klang Valley; Malaysia                      | Cooking, cleaning, housework, occupant's activities, smoking | PM2.5, PM10            | Living room             | Not recorded                                     | Urban mean concentrations ( $\mu\text{g}/\text{m}^3$ ):<br>PM2.5: 50.77<br>PM10: 80.07<br>Rural mean concentrations ( $\mu\text{g}/\text{m}^3$ ):<br>PM2.5: 25.63<br>PM10: 45.38 | Location, outdoor sources, frequency of cooking, occupants activities                                                                |
| Ohura et al. 2002 [111]      | 41 households                                                                                                                      | Fuji; Japan                                 | Smoking in one house                                         | 39 PAHs                | Not recorded            | Summer 1999, winter 1999–2000                    | GM concentration naphthalene: 1.5 $\mu\text{g}/\text{m}^3$                                                                                                                       | Natural ventilation, attached garage, tatami mat, building age, heating/cooling mode                                                 |
| Olsen et al. 2014 [48]       | 60 non-smoking households                                                                                                          | Copenhagen; Denmark                         | Not reported                                                 | PNC (10–300 nm), PM2.5 | Living room             | February–May 2013                                | Median<br>PNC: 8400 #/cm <sup>3</sup><br>PM2.5: 12.2 $\mu\text{g}/\text{m}^3$                                                                                                    | Not reported                                                                                                                         |
| Osman et al. 2007 [54]       | 148 households                                                                                                                     | Aberdeen; UK                                | Smoking, heating                                             | PM2.5, NO <sub>2</sub> | Living room and bedroom | October 2004–May 2005                            | Median concentrations:<br>PM2.5: 18 $\mu\text{g}/\text{m}^3$<br>NO <sub>2</sub> : 7.8 ppb<br>endotoxins: 95.8 EU/mg                                                              | Smoking, central heating, kitchen adjoining living room, floor area                                                                  |
| Park and Ikeda 2006 [88]     | 1417 households                                                                                                                    | Japan—widely distributed across the country | Building materials                                           | VOCs                   | Living room, bedroom    | July 2000–October 2000; July 2001–September 2001 | Mean concentrations ( $\mu\text{g}/\text{m}^3$ ) new/older homes (years 1–3):<br>formaldehyde: 111/89<br>toluene: 18.7/12.0<br>p-xylene: 19.7/16.0<br>ethylbenzene: 13.7/6.3     | Building materials, wooden materials, type of room, building age                                                                     |

|                                            |                                                       |                                                               |                                                                                        |                            |                                                           |                            |                                                                                                                                                            |                                                                                                                                                                                                         |
|--------------------------------------------|-------------------------------------------------------|---------------------------------------------------------------|----------------------------------------------------------------------------------------|----------------------------|-----------------------------------------------------------|----------------------------|------------------------------------------------------------------------------------------------------------------------------------------------------------|---------------------------------------------------------------------------------------------------------------------------------------------------------------------------------------------------------|
|                                            |                                                       |                                                               |                                                                                        |                            |                                                           |                            | styrene: 25.3/6.0<br>limonene: 32.0/35.3<br>$\alpha$ -Pinene: 133.3/33.0                                                                                   |                                                                                                                                                                                                         |
| <b>Paulin et al.<br/>2014<br/>[129]</b>    | 100 homes                                             | Baltimore;<br>USA                                             | Cooking stoves,<br>pilot lights (gas<br>appliances)                                    | NO2                        | Kitchen and<br>main bedroom                               | June 2009–<br>March 2011   | NO2 median concentrations (ppb):<br>Kitchen:<br>baseline 12.2<br>1 week 25.5<br>3 months 24.7<br>Bedroom:<br>baseline 13.1<br>1 week 14.2<br>3 months 18.2 | Using gas<br>appliances, 3<br>interventions<br>(stove<br>replacement,<br>ventilation hood,<br>air purifier)                                                                                             |
| <b>Paulin et al.<br/>2017<br/>[67]</b>     | 30 households<br>(houses,<br>apartments, others)      | Baltimore;<br>USA                                             | Gas cookers                                                                            | NO2                        | Kitchen                                                   | November–<br>March         | NO2 mean concentration:<br>109 $\mu\text{g}/\text{m}^3$                                                                                                    | Frequency of<br>daily cooking<br>appliance use,<br>windows open<br>for more than 10<br>minutes, distance<br>from curb to<br>front door,<br>season                                                       |
| <b>Pavilonis et<br/>al. 2013<br/>[140]</b> | 197 households<br>(single-family<br>home, trailer)    | Keokuk<br>county;<br>USA                                      | Smoking, cooking,<br>heating, pets                                                     | PM10,<br>PM2.5,<br>CO, CO2 | Main living<br>area                                       | 2007–2011 (all<br>seasons) | GM concentrations ( $\mu\text{g}/\text{m}^3$ ):<br>PM10: 21.2<br>PM2.5: 12.2<br>Endotoxins: 0.21                                                           | Use of gas<br>appliances and<br>AC, indoor<br>relative<br>humidity, overall<br>home cleanliness,<br>pets, smoking,<br>outdoor<br>concentrations,<br>location of<br>dwellings<br>(rural/town),<br>season |
| <b>Phillips et al.<br/>2005<br/>[81]</b>   | 42 households<br>(detached, single-<br>family houses) | Oklahoma<br>city, Tulso,<br>Ponca city,<br>Stillwater;<br>USA | Cleaning products,<br>scented candles and<br>potpourri, glues,<br>paints, and sealants | 11 VOCs                    | Main living<br>area, usually<br>kitchen or<br>living room | Multi season               | Median concentrations ( $\mu\text{g}/\text{m}^3$ )<br>day, night:<br>toluene: 12, 22<br>benzene: 0.62, 1.2<br>o-xylene: 0.30, 0.67<br>p-xylene: 2.3, 3.2   | Building<br>materials,<br>building age,<br>building<br>airtightness                                                                                                                                     |

|                                           |                                                                                                         |                                                    |                                                                                                                                                                               |                                                                             |                                    |                                                                       |                                                                                                                                                                                                                                    |                                                                                                                                                                 |
|-------------------------------------------|---------------------------------------------------------------------------------------------------------|----------------------------------------------------|-------------------------------------------------------------------------------------------------------------------------------------------------------------------------------|-----------------------------------------------------------------------------|------------------------------------|-----------------------------------------------------------------------|------------------------------------------------------------------------------------------------------------------------------------------------------------------------------------------------------------------------------------|-----------------------------------------------------------------------------------------------------------------------------------------------------------------|
| <b>Pickett and Bell 2011 [119]</b>        | 10 households (single-family detached dwelling, townhouse or duplex, multiple story apartment building) | Connecticut, New York, Vermont, Massachusetts; USA | Heating fuel, fireplaces, gas stoves, attached garage, mice, indoor pesticides, pets, aromatic candles, smoking, room deodorizers, air purifiers, renovations within 6 months | CO, CO <sub>2</sub> , PM <sub>0.5</sub> , TVOCs                             | Room where infant spends most time | June 2009–August 2009                                                 | Mean concentrations:<br>CO: 0.85 ppm<br>CO <sub>2</sub> : 663.2 ppm<br>PM <sub>0.5</sub> : 18.7 µg/m <sup>3</sup><br>TVOCs: 1626 µg/m <sup>3</sup>                                                                                 | Building age, use of gas stove, presence of pets, remodelling the nursery, distance to nearest road                                                             |
| <b>Raaschou-Nielsen et al. 2011 [139]</b> | 389 households                                                                                          | Copenhagen; Denmark                                | Smoking, stove candles, cooking, fireplace, cleaning                                                                                                                          | PM <sub>2.5</sub> , black smoke                                             | Infant's bedroom                   | All four seasons                                                      | Mean concentrations:<br>PM <sub>2.5</sub> : 19 µg/m <sup>3</sup><br>black smoke: 0.97×10 <sup>-5</sup> m <sup>-1</sup>                                                                                                             | Smoking, renovations, season, inner city residence, traffic intensity, frying, use of an oven, toasting, burning candles, leaving windows open, vacuum cleaning |
| <b>Rancière et al. 2011 [105]</b>         | 196 homes (mainly apartments average 70 m <sup>2</sup> surface area)                                    | Paris and surrounds; France                        | Smoking, floor or wall covering, cooking, heating, air fresheners                                                                                                             | Formaldehyde, acetaldehyde, hexaldehyde, styrene, nicotine, NO <sub>2</sub> | Infant's bedroom                   | October–March; April–September (twice per home between 2003 and 2006) | Mean concentrations (µg/m <sup>3</sup> )<br>cold, warm seasons:<br>formaldehyde: 17.2, 20.9<br>acetaldehyde: 8.9, 8.7<br>NO <sub>2</sub> : 22.2, 24.8                                                                              | Season, ozone, pressed wood products, nicotine levels, use of air fresheners, type and age of wall/floor coverings, cooking, heating/cooling mode               |
| <b>Raw et al. 2004 [101]</b>              | 876 households (flats/bedsits, terraced, semidetached, detached and bungalows)                          | England; UK                                        | Gas cooking, heating, building materials, paintings, smoking                                                                                                                  | CO, NO <sub>2</sub> , VOCs                                                  | Kitchen, bedroom                   | October 1997–February 1999                                            | GM concentrations:<br>CO (mg/m <sup>3</sup> ):<br>bedroom: 0.39<br>kitchen: 0.47<br>NO <sub>2</sub> (µg/m <sup>3</sup> ):<br>bedroom: 11.9<br>kitchen: 21.8<br>TVOC: 210 µg/m <sup>3</sup><br>formaldehyde: 22.2 µg/m <sup>3</sup> | Gas cooking, tobacco smoking, use of combustion appliances for heating, season, cooking fuel, heating fuel, presence/location                                   |

|                                       |                                        |                                    |                                                                                                               |                                                                |                                                     |                                                                                                        |                                                                                                                                                                                                                              |                                                                                |
|---------------------------------------|----------------------------------------|------------------------------------|---------------------------------------------------------------------------------------------------------------|----------------------------------------------------------------|-----------------------------------------------------|--------------------------------------------------------------------------------------------------------|------------------------------------------------------------------------------------------------------------------------------------------------------------------------------------------------------------------------------|--------------------------------------------------------------------------------|
|                                       |                                        |                                    |                                                                                                               |                                                                |                                                     |                                                                                                        | Benzene: 3.0 µg/m <sup>3</sup><br>m,p-xylene: 3.8 µg/m <sup>3</sup><br>toluene: 15.1 µg/m <sup>3</sup><br>limonene: 6.2 µg/m <sup>3</sup>                                                                                    | of garage,<br>dwelling type,<br>building age,<br>flooring                      |
| <b>Rojas-Bracho et al. 2000 [125]</b> | 18 households                          | Boston; USA                        | Not recorded                                                                                                  | PM2.5, PM10, PM2.5–10                                          | Main activity room of the house (excluding kitchen) | Winter, February 1996–March 1996; summer, June 1996–September 1996; winter, January 1997–February 1997 | Mean concentrations (µg/m <sup>3</sup> ):<br>PM2.5: 17.5<br>PM10: 31.9<br>PM2.5–10: 14.5                                                                                                                                     | Air exchange rates, season, personal and outdoor concentrations                |
| <b>Rojas-Bracho et al. 2004 [21]</b>  | 18 households                          | Boston; USA                        | Cleaning, cooking                                                                                             | PM2.5, PM10, PM2.5–10                                          | Main activity room (excluding kitchen)              | Winter and summer, 1996 and 1997                                                                       | Mean concentrations (µg/m <sup>3</sup> )<br>winter, summer:<br>PM2.5: 17.2, 17.7<br>PM10: 37.3, 28.3<br>PM2.5–10: 20.1, 10.7                                                                                                 | Air exchange rates, ventilation, cleaning                                      |
| <b>Romagnoli et al. 2016 [136]</b>    | 2 households in medium sized buildings | Rome; Italy                        | Smoking, cooking, heating, cleaning products                                                                  | PM2.5, PAHs, O <sub>2</sub> , SO <sub>2</sub> , O <sub>3</sub> | Bedroom (one dwelling), dining room, balcony        | March 2013                                                                                             | Mean concentrations (µg/m <sup>3</sup> ):<br>PM2.5: 31<br>ΣPAH: 3.15                                                                                                                                                         | Ventilation, smoking, condensation of vapours                                  |
| <b>Rosen et al. 2015 [22]</b>         | 27 households                          | Israel                             | Tobacco smoking, cooking, heating, outdoor sources                                                            | PM2.5                                                          | Central area                                        | March 2013–September 2013                                                                              | PM2.5 mean concentration: 0.022 µg/m <sup>3</sup>                                                                                                                                                                            | Presence of tobacco smoke, open plan kitchen, window opening                   |
| <b>Rotko et al. 2000 [160]</b>        | 201 households                         | Helsinki; Finland                  | Smoking                                                                                                       | PM2.5                                                          | Not recorded                                        | October 1996–December 1997                                                                             | PM2.5 mean concentration: 11.73 µg/m <sup>3</sup>                                                                                                                                                                            | Not reported                                                                   |
| <b>Rovira et al. 2016 [104]</b>       | 10 households                          | Tarragona County, Catalonia; Spain | Building materials, paints, varnishes, household cleaning products, smoking                                   | Formaldehyde                                                   | Bedroom, living room                                | January 2014–February 2014                                                                             | Mean concentrations (µg/m <sup>3</sup> )<br>formaldehyde:<br>bedroom: 27.3<br>living room: 22.5                                                                                                                              | Diffusion between rooms                                                        |
| <b>Rumchev et al. 2004 [74]</b>       | 192 households                         | Perth; Australia                   | Smoking, heating, cooking, floor adhesives, furnishings, polishes, room fresheners, cleaning, solvents, paint | 10 VOCs                                                        | Living room                                         | Winter, June 1998–September 1998; summer, December 1998–March 1999                                     | Median concentrations (µg/m <sup>3</sup> )<br>cases vs. control:<br>benzene: 24.8 vs. 11.8<br>toluene: 11.9 vs. 6.2<br>m-xylene: 1.4 vs. 0.7<br>o,p-xylene: 5.9 vs. 3.2<br>ethylbenzene: 1.4 vs. 0.8<br>TVOCs: 78.5 vs. 36.6 | Recently painted houses, smoking, new carpet or furnishing, dust mite allergen |

|                                        |                                                       |                                    |                                                                                                                      |                                                    |                                                |                            |                                                                                                                                                                                                                                                                                               |                                                                                                                                                             |
|----------------------------------------|-------------------------------------------------------|------------------------------------|----------------------------------------------------------------------------------------------------------------------|----------------------------------------------------|------------------------------------------------|----------------------------|-----------------------------------------------------------------------------------------------------------------------------------------------------------------------------------------------------------------------------------------------------------------------------------------------|-------------------------------------------------------------------------------------------------------------------------------------------------------------|
| <b>Russo et al.<br/>2015<br/>[156]</b> | 32 households (15 smoking vs. 17 non-smoking)         | Boston; USA                        | Smoking, cooking, candles                                                                                            | PM2.5                                              | Primary living area; common entries or hallway | August–December 2012       | PM2.5 median ( $\mu\text{g}/\text{m}^3$ )<br>resident smokers: 10.6<br>hallway/shared entry: 5.1<br>smoke-free buildings: 4.8<br>smoking-permitted buildings: 8.1                                                                                                                             | Smoke transfer, open windows                                                                                                                                |
| <b>Ryan et al.<br/>2015<br/>[16]</b>   | 168 households                                        | California, Texas, New Jersey; USA | Flooring, heating, use of household and personal care products, cooking, candles, road traffic, industrial emissions | PM2.5                                              | Not reported                                   | Not reported               | PM2.5 mean concentration: 18.5 $\mu\text{g}/\text{m}^3$                                                                                                                                                                                                                                       | Presence of a basement, unvented appliances, proximity to industry, service stations or restaurants, presence and type of air conditioning, attached garage |
| <b>Saijo et al.,<br/>2004<br/>[83]</b> | 96 (mainly detached wooden houses also some duplexes) | Sapporo; Japan                     | Building materials                                                                                                   | VOCs                                               | Living room                                    | August 2001–September 2001 | GM concentrations:<br>formaldehyde: 56.0 ppb<br>acetaldehyde: 10.2 ppb<br>ethylbenzene: 18.7 $\mu\text{g}/\text{m}^3$<br>toluene: 325.5 $\mu\text{g}/\text{m}^3$<br>limonene: 25.0 $\mu\text{g}/\text{m}^3$<br>xylene: 26.0 $\mu\text{g}/\text{m}^3$<br>TVOCs: 482.6 $\mu\text{g}/\text{m}^3$ | Ventilation, dampness, presence of pets, household size, smoking, building age                                                                              |
| <b>Saraga et al.<br/>2010<br/>[85]</b> | 2 households (apartments)                             | Athens; Greece                     | Smoking                                                                                                              | PM1, PM2.5, benzene, toluene, m,p-xylene, o-xylene | Living room                                    | May 2005                   | Mean concentrations ( $\mu\text{g}/\text{m}^3$ )<br>smokers vs. non-smokers:<br>benzene: 6.85 vs. 5.06<br>m,p-xylene: 8.14 vs. 9.63<br>toluene: 23.3 vs. 18.6<br>o-xylene: 4.25 vs. 3.56                                                                                                      | Outdoor air, smoking, ventilation, air exchange rate, temperature, wind speed, relative humidity of outdoor air                                             |
| <b>Schneider et al. 2001<br/>[86]</b>  | 405 households                                        | Erfurt, Hamburg; Germany           | Oil stoves, paint, solvents, cooking, cleaning, heating                                                              | VOCs                                               | Living room, bedroom                           | June 1995–November 1996    | Median concentrations ( $\mu\text{g}/\text{m}^3$ )<br>Hamburg vs. Erfurt:<br>benzene: 1.48 vs. 2.17<br>toluene: 20.46 vs. 37.29<br>ethylbenzene: 0.70 vs. 1.67<br>m,p-xylene: 2.92 vs. 4.17<br>o-xylene: 0.79 vs. 1.20                                                                        | Seasons, insulation, proximity to busy road, ventilation, location (urban/rural)                                                                            |

|                                           |                                                                                     |                                                  |                                                                                                                      |                                             |                                     |                                                                      |                                                                                                                                       |                                                                                                                                                                    |
|-------------------------------------------|-------------------------------------------------------------------------------------|--------------------------------------------------|----------------------------------------------------------------------------------------------------------------------|---------------------------------------------|-------------------------------------|----------------------------------------------------------------------|---------------------------------------------------------------------------------------------------------------------------------------|--------------------------------------------------------------------------------------------------------------------------------------------------------------------|
| <b>Simoni et al.<br/>2004<br/>[123]</b>   | 421 households                                                                      | Po Delt,<br>Pisa; Italy                          | Gas furnace, gas<br>water furnace,<br>carpets, ETS, wood<br>burning, smoking                                         | PM2.5,<br>NO2                               | Kitchen, living<br>room,<br>bedroom | Winter and<br>summer Po<br>Delta 1991–<br>1992 and Pisa<br>1993–1994 | NO2 mean concentrations (ppb):<br>winter: 18.5<br>summer: 14                                                                          | Type of heating<br>system, location<br>(urban/rural),<br>ventilation                                                                                               |
| <b>Simons et al.<br/>2007<br/>[151]</b>   | 120 households<br>(detached or<br>duplex homes in<br>the suburbs and<br>inner city) | Baltimore;<br>USA                                | Gas stove, smoking,<br>disrepair, cockroach<br>or mice infestation,<br>pets, mould                                   | PM 2.5,<br>PM10, O3,<br>NO2                 | Child's<br>bedroom                  | Unknown                                                              | Mean concentrations (µg/m³):<br>PM10: 23<br>PM2.5: 12<br>O3: 0.03<br>NO2 < detection limit                                            | Smoking, gas<br>stoves, carpet,<br>pets, moisture,<br>mildew,<br>crack+Asbestos in<br>walls, leaky roof,<br>temperature,<br>musty smell,<br>natural<br>ventilation |
| <b>Singleton et<br/>al. 2017<br/>[92]</b> | 63 households                                                                       | Alaska;<br>USA                                   | Wood stove, fuel oil,<br>visible mould,<br>tobacco smoke,<br>detergent,<br>insecticide, fuel<br>presence/<br>storage | PM2.5,<br>VOC, CO2                          | Living room                         | Season not<br>reported,<br>2012–2015                                 | Median concentrations:<br>PM2.5: 33 µg/m³<br>TVOC: 99.3 µg/m³<br>CO2: 1401 ppm                                                        | Crowding,<br>reduced<br>ventilation, use<br>of homes as<br>workshops                                                                                               |
| <b>Su et al.<br/>2013<br/>[147]</b>       | 310 households                                                                      | Elizabeth,<br>Houston,<br>Los<br>Angeles;<br>USA | Cooking, heating,<br>ventilation,<br>cleaning devices,<br>paint and solvents,<br>pets                                | 18 VOCs                                     | Not recorded                        | Summer 1999–<br>spring 2001                                          | Mean concentrations (µg/m³):<br>benzene: 3.54<br>ethylbenzene: 2.55<br>toluene: 15.26<br>m/p-xylene: 7.39<br>o-xylene: 2.49           | Living in<br>Houston,<br>attached garage,<br>self-pumped gas,<br>wind speeds,<br>house AERs, use<br>of gas<br>heating/stove,<br>open<br>windows/doors              |
| <b>Takeda et al.<br/>2009<br/>[95]</b>    | 104 households<br>(detached houses)                                                 | Sapporo<br>City; Japan                           | Pets, smoking, room<br>fragrance, insect<br>repellent, mould                                                         | Formaldeh<br>yde,<br>acetaldehy<br>de, VOCs | Living room                         | September<br>2004–October<br>2004                                    | Median concentrations (µg/m³)<br>SBS, non-SBS symptoms:<br>formaldehyde: 70.1, 63.2<br>acetaldehyde: 35.9, 33.5<br>VOCs: 181.6, 127.6 | Presence of pets,<br>smoking, using<br>room fragrance,<br>using insect<br>repellent, time<br>spent in<br>dwelling,<br>building age,<br>building<br>materials       |

|                                       |                                                      |                                                         |                                                                                     |                                                                                                                                                 |                              |                                               |                                                                                                                                                                                                                                                                                                 |                                                                                                             |
|---------------------------------------|------------------------------------------------------|---------------------------------------------------------|-------------------------------------------------------------------------------------|-------------------------------------------------------------------------------------------------------------------------------------------------|------------------------------|-----------------------------------------------|-------------------------------------------------------------------------------------------------------------------------------------------------------------------------------------------------------------------------------------------------------------------------------------------------|-------------------------------------------------------------------------------------------------------------|
| <b>Takigawa et al. 2010 [108]</b>     | 425 households (conventional homes, detached houses) | Hokkaido, Fukushima, Osaka, Okayama, Fukuoka; Japan     | Wood, cleaning products, nail polish and remover                                    | Aldehydes / VOCs                                                                                                                                | Living room                  | Autumn, September–December in 2004 and 2005   | Median concentrations ( $\mu\text{g}/\text{m}^3$ )<br>SBS, non-SBS symptoms:<br>formaldehyde: 48.5, 39.4<br>acetaldehyde: 24.3, 22.2<br>benzene: 1.1, 1.1<br>toluene: 12.9, 12.9<br>ethylbenzene: 3.2, 2.8<br>xylene: 6.0, 5.8                                                                  | Age of building, building materials, detergents, air fresheners                                             |
| <b>Takigawa et al. 2012 [99]</b>      | 260 households ( $\leq 6$ years old in 2003)         | Japan (6 cities)                                        | Smoking, pets, dew condensation, mould, use of moth repellent, use of air freshener | 29 VOCs and 13 aldehydes                                                                                                                        | Living room                  | Autumn, September–December in 2004 and 2005   | Median concentrations ( $\mu\text{g}/\text{m}^3$ ) in 2004, 2005:<br>formaldehyde: 39.2, 31.5<br>acetaldehyde: 20.8, 15.7<br>benzene: 1.1, 1.6<br>toluene: 11.8, 10.9<br>xylene: 5.8, 5.7<br>ethylbenzene: 2.7, 3.3                                                                             | Not recorded                                                                                                |
| <b>Tanaka-Kagawa et al. 2005 [69]</b> | 50 households                                        | Iwate, Yamanshi, Shiga, Hyogo, Kochi, Fukuoka; Japan    | Not reported                                                                        | 132 VOCs                                                                                                                                        | Not reported                 | January 2005–February 2005                    | Mean concentrations ( $\mu\text{g}/\text{m}^3$ ):<br>toluene: 16<br>m,p-xylene: 9.3<br>benzene: 3.2<br>ethylbenzene: 5.3<br>o-xylene: 4.1<br>naphthalene: 2.6<br>limonene: 30<br>$\alpha$ -pinene: 47<br>$\beta$ -pinene: 19                                                                    | Not reported                                                                                                |
| <b>Taneja et al. 2008 [40]</b>        | 20 households (10 urban and 10 roadside)             | Agra; India                                             | Fuel for cooking, cleaning substance, cooking                                       | CO <sub>2</sub> , CO, NO <sub>2</sub> , NO, SO <sub>2</sub> , Cl <sub>2</sub> , H <sub>2</sub> S, NH <sub>3</sub> , and PM <sub>10</sub> , PAHs | Living room                  | October 2004–December 2005                    | Mean monthly concentrations rural vs. roadside sites:<br>SO <sub>2</sub> : 10 ppb vs. 17 ppb<br>NO <sub>2</sub> : 17.8 ppb vs. 17.1 ppb<br>CO <sub>2</sub> : 422 ppm vs. 492 ppm<br>CO: 1.12 ppm vs. 1.7 ppm                                                                                    | Cooking fuel, kerosene and gas heater use, wood coal stoves, smoking, natural ventilation, wood, heavy oils |
| <b>Topp et al. 2004 [145]</b>         | 631 households                                       | Erfurt, Hamburg, Zerbst, Bitterfeld, Hettstedt; Germany | Not reported                                                                        | BTEX, NO <sub>2</sub>                                                                                                                           | Living room, bedroom/nursery | June 1995–May 1997; April 1996–September 1998 | Median concentrations ( $\mu\text{g}/\text{m}^3$ ) living rooms at 1st and 2nd visit:<br>NO <sub>2</sub> : 14.9, 15.2<br>toluene: 35.7, 32.3<br>m,p-xylene: 3.5, 4.0<br>o-xylene: 1.1, 1.1<br>ethylbenzene: 1.5, 1.5<br>benzene: 2.0, 2.5<br>Median concentrations ( $\mu\text{g}/\text{m}^3$ ) | Smoking, gas cooking                                                                                        |

|                                    |                |                                         |                                                                                                                                            |                                                                 |                                |                                                                             |                                                                                                                                                                                                                                                                                                                                    |                                                                                            |
|------------------------------------|----------------|-----------------------------------------|--------------------------------------------------------------------------------------------------------------------------------------------|-----------------------------------------------------------------|--------------------------------|-----------------------------------------------------------------------------|------------------------------------------------------------------------------------------------------------------------------------------------------------------------------------------------------------------------------------------------------------------------------------------------------------------------------------|--------------------------------------------------------------------------------------------|
|                                    |                |                                         |                                                                                                                                            |                                                                 |                                |                                                                             | bedroom/nursery at 1st and 2nd visit:<br>NO <sub>2</sub> : 13.8, 14.5<br>toluene: 21.0, 20.3<br>m,p-xylene: 3.0, 3.2<br>o-xylene: 0.7, 0.6<br>ethylbenzene: 1.2, 1.1<br>benzene: 1.7, 2.1                                                                                                                                          |                                                                                            |
| <b>Tunno et al. 2015 [31]</b>      | 21 households  | Pittsburgh; USA                         | Cooking, smoking, cleaning, outdoor sources                                                                                                | PM <sub>2.5</sub>                                               | Main activity room             | Summer, July 2011–September 2011; winter, January 2012–March 2012           | PM <sub>2.5</sub> mean concentrations (µg/m <sup>3</sup> ):<br>summer: 25.8<br>winter: 18.9                                                                                                                                                                                                                                        | Windows opening, cooking activity, cigarettes smoked, kitchen cleaning, number of children |
| <b>Uchiyama et al. 2015 [55]</b>   | 602 households | Japan                                   | Household products (e.g., moth balls), space deodorizers, insecticides, kerosene heaters, gas stoves and heaters, pets, building materials | Carbonyls, VOCs, NO <sub>2</sub> , O <sub>3</sub>               | Living room                    | Winter 2012, 2013, 2014 (January–March), summer 2012, 2013 (July–September) | Benzene (µg/m <sup>3</sup> ):<br>winter: 2.3<br>summer: 1.3<br>Toluene (µg/m <sup>3</sup> ):<br>winter: 11<br>summer: 12<br>NO <sub>2</sub> (µg/m <sup>3</sup> ):<br>winter: 220<br>summer: 13<br>Formaldehyde (µg/m <sup>3</sup> ):<br>winter: 13<br>summer: 34<br>Acetaldehyde (µg/m <sup>3</sup> ):<br>winter: 22<br>summer: 17 | Season/temperature, drinking alcohol (acetaldehyde)                                        |
| <b>Vanker et al. 2015 [143]</b>    | 600 homes      | Drakenstain, Western Cape; South Africa | Heating, cooking, smoking, pesticides, cleaning products                                                                                   | PM <sub>10</sub> , SO <sub>2</sub> , NO <sub>2</sub> , CO, VOCs | Communal area/main living room | March 2011–May 2014                                                         | Median concentrations (µg/m <sup>3</sup> ):<br>PM <sub>10</sub> : 33.1<br>CO/SO <sub>2</sub> : 0<br>NO <sub>2</sub> : 7.9<br>benzene: 5.6<br>toluene: 19.8                                                                                                                                                                         | Type of home/kitchen, ventilation, informal construction, crowding, fuel usage             |
| <b>Villanueva et al. 2015 [76]</b> | 22 households  | Puertollano ; Spain                     | Smoking, furniture, furnishings, heating, cooling                                                                                          | VOCs Carbonyls                                                  | Living room                    | May–June 2011                                                               | Mean concentrations (µg/m <sup>3</sup> ):<br>benzene: 1.9<br>toluene: 12.0<br>ethylbenzene: 3.4<br>m/p-xylene: 7.0<br>formaldehyde: 54.6                                                                                                                                                                                           | Ventilation, smoking, furniture age, use of heating, air conditioning, indoor carpet       |

|                                    |                                                                 |                                                                                      |                                                                                               |                           |                                                                                                  |                                      |                                                                                                                                                                                                                                                           |                                                                                                                                                                                                                |
|------------------------------------|-----------------------------------------------------------------|--------------------------------------------------------------------------------------|-----------------------------------------------------------------------------------------------|---------------------------|--------------------------------------------------------------------------------------------------|--------------------------------------|-----------------------------------------------------------------------------------------------------------------------------------------------------------------------------------------------------------------------------------------------------------|----------------------------------------------------------------------------------------------------------------------------------------------------------------------------------------------------------------|
|                                    |                                                                 |                                                                                      |                                                                                               |                           |                                                                                                  |                                      | acetaldehyde: 23.0<br>$\alpha$ -pinene: 18.5<br>limonene: 17.1                                                                                                                                                                                            | (toluene),<br>location                                                                                                                                                                                         |
| Wallace et al.<br>2003<br>[20]     | 294 households                                                  | Boston,<br>Bronx,<br>Chicago,<br>Dallas,<br>Manhattan,<br>Seattle,<br>Tucson;<br>USA | Smoking, cooking,<br>incense,<br>cleaning                                                     | PM2.5                     | Living area if<br>possible—<br>alternatives<br>including<br>child's<br>bedroom or<br>dining room | Unspecified                          | PM2.5 mean concentration:<br>27.7 $\mu\text{g}/\text{m}^3$                                                                                                                                                                                                | Smoking,<br>cooking, type of<br>cooking (frying),<br>burning incense,<br>housing type<br>(apartment<br>housing)                                                                                                |
| Wallace et al.<br>2006<br>[44]     | 1 townhouse (3<br>level with 4<br>bedrooms)                     | Reston;<br>USA                                                                       | Cooking appliances,<br>candles, gas clothes<br>dryer, air fresheners                          | UFP                       | Basement/<br>recreation<br>room                                                                  | October 1996<br>and March of<br>2001 | Mean concentrations ( $\#/\text{cm}^3$ )<br>for six size ranges of particles:<br>10–18: 4589<br>18–50: 10101<br>50–100: 6045<br>100–200: 2238<br>200–450: 405<br>450–950: 321                                                                             | Use of central<br>fan/duct system,<br>type of cooking,<br>burning incense<br>and candles,<br>natural<br>ventilation                                                                                            |
| Wang et al.<br>2017<br>[90]        | 25 households (19<br>homes in London<br>and 6 homes in<br>York) | London<br>and York;<br>UK                                                            | Cleaning products,<br>consumer products<br>(air fresheners,<br>fragrance, scented<br>candles) | VOCs,<br>Formaldeh<br>yde | Living room                                                                                      | Spring, 2015;<br>Autumn, 2015        | Range of 5 day means ( $\mu\text{g}/\text{m}^3$ ):<br>London:<br>VOC <LOD–54<br>York:<br>$\alpha$ -pinene: 2–229<br>d-limonene: 18–1439<br>isoprene: 11–22<br>benzene 7–19<br>formaldehyde (72 hour average<br>in 3 homes): 46.8 $\mu\text{g}/\text{m}^3$ | Single or double<br>glazed windows,<br>open plan<br>kitchen,<br>occupants<br>activities, e.g.,<br>cleaning, use of<br>personal care<br>products                                                                |
| Weichenthal<br>et al. 2007<br>[47] | 36 households<br>(single-family<br>homes, town<br>houses)       | Montreal,<br>Pembroke;<br>Canada                                                     | Heating, smoking,<br>vacuuming, dusting,<br>kitchen exhaust,<br>candles, gas dryer            | UFP, PM4                  | Kitchen and<br>living room                                                                       | December<br>2005–March<br>2006       | UFP mean concentrations by heating<br>system type ( $\#/\text{cm}^3$ ):<br>electric board: 17064<br>wood stove: 17546<br>forced air oil furnace: 11039<br>forced air gas furnace: 13009<br>PM4 mean concentration: 192.07 $\mu\text{g}/\text{m}^3$        | Cooking time,<br>heating system<br>type, occupant<br>density, number<br>of smokers,<br>urban location,<br>age of the<br>building, electric<br>heaters, size of<br>the building,<br>cleaning<br>frequency, type |

|                           |                                                                                                                                                                  |              |                                                                                                                                                   |                                                             |                                                                                                                                                                                    |                             |                                                                                                                                                                                                                                                                                                                  | of cooking system                                                                                                                                                                                                    |
|---------------------------|------------------------------------------------------------------------------------------------------------------------------------------------------------------|--------------|---------------------------------------------------------------------------------------------------------------------------------------------------|-------------------------------------------------------------|------------------------------------------------------------------------------------------------------------------------------------------------------------------------------------|-----------------------------|------------------------------------------------------------------------------------------------------------------------------------------------------------------------------------------------------------------------------------------------------------------------------------------------------------------|----------------------------------------------------------------------------------------------------------------------------------------------------------------------------------------------------------------------|
| Weitzman et al. 2016 [28] | 33 households (11 homes where only hookah was smoked, 12 homes where only cigarettes were smoked, and 10 homes where neither hookahs nor cigarettes were smoked) | Dubai; UAE   | Hookahs, cigarettes, incense                                                                                                                      | PM2.5, black carbon, elemental and organic carbon, CO       | Room where smoking occurred and in one adjacent non-smoking room in homes where hookahs or cigarettes were smoked. In non-smoking homes, bedroom and living room (averaged values) | Not reported                | Mean concentrations<br>PM2.5 (µg/m³):<br>hookah/adjacent 428.6/210.8<br>cigarette/adjacent 201.2/96.7<br>non-smoking 93.2<br>BC (µg/m³):<br>hookah/adjacent 5.4/3.7<br>cigarette/adjacent 4.2/3.0<br>non-smoking 2.1<br>CO (mg/m³):<br>hookah/adjacent 12.6/6.7<br>cigarette/adjacent 2.6/1.8<br>non-smoking 1.7 | Use of hookahs or cigarettes at home, length of smoking time, the number of smokers, number of hookahs or cigarettes smoked, ventilation during smoking sessions, number of children in households, size of the room |
| Wheeler et al. 2013 [70]  | 3857 households (single detached, double, row/terrace, duplex, low-rise or high-rise apartment)                                                                  | Canada       | Renovations, furnishings, heating source, household, cleaning and personal care products, crafts and DIY (products), pesticides, candles, smoking | BTEX: benzene, toluene, ethylbenzene, m/p-xylenes, o-xylene | Living or family room                                                                                                                                                              | August 2009–November 2011   | Mean concentrations (µg/m³):<br>benzene: 1.95<br>toluene: 19.17<br>ethylbenzene: 4.09<br>m/p-xylene: 14.42<br>o-xylene: 4.16                                                                                                                                                                                     | Garage on property, regular smoking, renovations, No. of occupants, use of paint remover, use of fragrance, dwelling type                                                                                            |
| Wigzell et al 2000 [30]   | 10 households                                                                                                                                                    | Oxford; UK   | Cooking, smoking                                                                                                                                  | PM2.5, TSP, fine particles                                  | Kitchen, living room                                                                                                                                                               | June 1999–July 1999         | Mean concentrations (µg/m³)<br>kitchen, living room:<br>PM2.5: 13, 12<br>TSP: 32, 41<br>fine particles: 942, 1033                                                                                                                                                                                                | Gas cooking, fan use when cooking, vacuuming, natural ventilation, smoking                                                                                                                                           |
| Wyss et al 2016 [23]      | 36 households (14 stove users, 22 non-users)                                                                                                                     | Oslo; Norway | Wood stove or fireplace, candles, frying food, activities accidentally producing smoke                                                            | PM2.5                                                       | Living room                                                                                                                                                                        | November 2012–February 2013 | PM2.5 hourly mean concentrations (µg/m³):<br>homes with wood stove: 15.6<br>homes without stove: 12.6                                                                                                                                                                                                            | Ventilation (opening windows), age of stove used                                                                                                                                                                     |

|                                          |                                         |                          |                                 |                                                                                                                                     |                                             |                          |                                                                                                                                                                                                                                                                                                                  |                                                                                                                  |
|------------------------------------------|-----------------------------------------|--------------------------|---------------------------------|-------------------------------------------------------------------------------------------------------------------------------------|---------------------------------------------|--------------------------|------------------------------------------------------------------------------------------------------------------------------------------------------------------------------------------------------------------------------------------------------------------------------------------------------------------|------------------------------------------------------------------------------------------------------------------|
| <b>Yeatts et al.<br/>2012<br/>[107]</b>  | 628 households in rural and urban areas | UAE (all seven emirates) | Incense, gas stove, smoking     | SO <sub>2</sub> , NO <sub>2</sub> , H <sub>2</sub> S, formaldehyde, CO, PM <sub>2.5</sub> , PM <sub>2.5</sub> –10, PM <sub>10</sub> | Living room                                 | October 2009–May 2010    | Median concentrations:<br>SO <sub>2</sub> : <0.010 ppm<br>NO <sub>2</sub> : <0.006 ppm<br>H <sub>2</sub> S: <0.060 ppm<br>formaldehyde: 0.006 ppm<br>CO: 0.761 ppm<br>PM <sub>2.5</sub> : 6.20 µg/m <sup>3</sup><br>PM <sub>2.5</sub> –10: 36.95 µg/m <sup>3</sup><br>PM <sub>10</sub> : 43.98 µg/m <sup>3</sup> | Dwelling type, frequency of incense use, cooking equipment type, kitchen configuration and gas cooking equipment |
| <b>Zipprich et al.<br/>2002<br/>[62]</b> | 23 households                           | Richmond; USA            | Air conditioner, stove, heating | NO <sub>2</sub> , NO, NO <sub>x</sub>                                                                                               | Living room or dining room and near bedroom | July 1999–September 1999 | Mean concentrations (ppb)<br>bedroom, living room:<br>NO <sub>2</sub> : 18, 19<br>NO: 57, 65<br>NO <sub>x</sub> : 75, 84                                                                                                                                                                                         | Smoking, carpet, humidity, building age                                                                          |

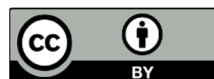

© 2020 by the authors. Licensee MDPI, Basel, Switzerland. This article is an open access article distributed under the terms and conditions of the Creative Commons Attribution (CC BY) license (<http://creativecommons.org/licenses/by/4.0/>).
